# Supplementary material for: Wnt signaling and polarity in freshwater sponges
Source: PubMed Central journal article supplement (PMC5797367; doi:10.1186/s12862-018-1118-0), 2018-02-02
Supplement: 12862_2018_1118_MOESM1_ESM.pdf [file 12862_2018_1118_MOESM1_ESM.pdf]

## Additional File 1

| Class                   | Species                                 | Data type             | Reference                | Source                                                                                        |
|-------------------------|-----------------------------------------|-----------------------|--------------------------|-----------------------------------------------------------------------------------------------|
| <b>Hexactinellida</b>   | <i>Aphrocallistes vastus</i>            | Transcriptome         | Riesgo et al 2014        | <a href="https://doi.org/10.7939/R3S000">https://doi.org/10.7939/R3S000</a>                   |
| <b>Demospongiae</b>     | <i>Ephydatia muelleri</i>               | Transcriptome         | n/a                      | Unpublished                                                                                   |
|                         | <i>Spongilla lacustris</i>              | Transcriptome         | Riesgo et al 2014        | GenBank BioProject PRJNA225591                                                                |
|                         | <i>Eunapius fragilis</i>                | Transcriptome         | n/a                      | Unpublished                                                                                   |
|                         | <i>Petrosia ficiformis</i>              | Transcriptome         | Riesgo et al 2014        | GenBank BioProject PRJNA162901                                                                |
|                         | <i>Chondrilla nucula</i>                | Transcriptome         | Riesgo et al 2014        | GenBank BioProject PRJNA225590                                                                |
|                         | <i>Ircinia fasciculata</i>              | Transcriptome         | Riesgo et al 2014        | GenBank BioProject PRJNA225586                                                                |
|                         | <i>Pseudospongosorites suberitoides</i> | Transcriptome         | Riesgo et al 2014        | GenBank BioProject PRJNA225580                                                                |
|                         | <i>Crella elegans</i>                   | Transcriptome         | Perez-Pollo et al 2013   | <a href="http://dx.doi.org/10.5061/dryad.50dc6/4">http://dx.doi.org/10.5061/dryad.50dc6/4</a> |
|                         | <i>Halisarca dujardini</i>              | Transcriptome         | Borisenko et al 2016     | <a href="http://www.ebi.ac.uk/ena">http://www.ebi.ac.uk/ena</a>                               |
|                         | <i>Amphimedon queenslandica</i>         | Accessioned sequences | Adamska et al 2007, 2010 | <a href="https://www.ncbi.nlm.nih.gov/">https://www.ncbi.nlm.nih.gov/</a>                     |
| <b>Homoscleromorpha</b> | <i>Corticium candelabrum</i>            | Transcriptome         | Riesgo et al 2014        | GenBank BioProject PRJNA162903                                                                |
|                         | <i>Oscarella carmela</i>                | Transcriptome         | n/a                      | <a href="http://www.compagen.org/">http://www.compagen.org/</a>                               |
|                         | <i>Oscarella lobularis</i>              | Accessioned sequence  | Lapebie et al 2009       | <a href="https://www.ncbi.nlm.nih.gov/">https://www.ncbi.nlm.nih.gov/</a>                     |
| <b>Calcarea</b>         | <i>Sycon ciliatum</i>                   | Accessioned sequences | Leininger et al 2014     | <a href="https://www.ncbi.nlm.nih.gov/">https://www.ncbi.nlm.nih.gov/</a>                     |
|                         | <i>Leucosolenia complicata</i>          | Transcriptome         | Fortunato et al 2012     | <a href="http://www.compagen.org/">http://www.compagen.org/</a>                               |
|                         | <i>Sycon coactum</i>                    | Transcriptome         | Riesgo et al 2014        | GenBank BioProject PRJNA162899                                                                |
