# Supplementary material for: Wnt signaling and polarity in freshwater sponges
Source: PubMed Central journal article supplement (PMC5797367; doi:10.1186/s12862-018-1118-0), 2018-02-02
Supplement: 12862_2018_1118_MOESM2_ESM.pdf [file 12862_2018_1118_MOESM2_ESM.pdf]

## Additional File 2

AquWntC 1 MKIFS-----RHYC-----  
PfiWntC 1 MRISIAKIM-----TC-----  
HdujWntC 1 MT-----  
AquWntB 1 MLCRG-----  
PfiWntB 1 M-----  
EmuWntB 1 MRMCECT-----  
SlaWntB 1 MRMSESI-----  
EfrWntB 1 MRMSELV-----  
AquWntA 1 MAFTS-----  
EmuWntA 1 -----  
SlaWntA 1 MDKRAVQ-----  
EfrWntA 1 MDKKAVQ-----  
CreWntA 1 MSLCT-----  
PsuWntA 1 MA-----  
CcaWntX1 1 M-----  
HdujWntL 1 MLLSDMDRGRT-----  
OloWntI 1 TRPA-----  
OcaWntI 1 MRV-----  
CcaWntI 1 MPYSV-----P-----  
LcoWntA 1 MNM-----  
SciWntA 1 MDSC-----  
ScoWnt-i 1 MEVCLVTF-----  
SciWntN 1 MTFVTECTV-----  
ScoWnt-ii 1 MAYVSQAA-----  
SciWntT 1 MASSL---HTSSHLQ-----GC-----  
LcoWntE 1 MYSLSMLAW-----  
SciWntE 1 MLLA-----  
ScoWnt-iii 1 RVPL-----  
LcoWntR 1 MSRSR---G-----  
SciWntR 1 MEQAQHVC-----  
LcoWntC 1 MAIR-----  
SciWntC 1 M-----  
ScoWnt-v 1 M-----  
LcoWntI 1 MASSK-----FTC-----  
SciWntI 1 MADG-----  
ScoWnt-iv 1 MS-----  
LcoWntJ 1 NTSGR-----  
SciWntJ 1 MA-----  
LcoWntG 1 MALLNM-----  
SciWntG 1 MANVG-----  
ScoWnt-vi 1 MATMP-----  
OcaWnt2X 1 ISVHSCLCMISRQ---TRFLCF--VNP-A  
EmuWntC 1 M-----  
SlaWntC 1 -----  
EfrWntC 1 MEGSASTAYSSLTAKI-----FSKLV-----  
CreWntC 1 MKEGMSFSSSSLQRIA-----LKEK---E-QARFC-----  
CcaWntX2 1 MLVTHQSSDEQTD-----  
LcoWntD 1 MMAWTSLQRFT-----  
SciWntD 1 M-----  
ScoWntX1 1 MAQCPQGRR-----W-----  
LcoWntF 1 MARNL-----  
SciWntF 1 MH-----  
LcoWntQ 1 FARFREANFLKPQAIG-----H-FVGCTKRSP-----S-FSSC-----  
SciWntQ 1 -----  
HdujWntD 1 MPTARDAD-----  
HdujWntE 1 -----  
HdujWntF 1 MKSFLTEVN-----  
HdujWntH 1 MTSLF-----C-----  
HdujWntI 1 MSRISPMSL-----  
HdujWntG 1 MTATA-----  
OloWntII 1 TRPNRRSSN-----  
OcaWntIIa 1 MH-----  
OcaWntIIb 1 SAPNSQQ-----  
OcaWntIIc 1 MFIKR-----  
OcaWnt5bX 1 M-----  
OcaWnt6X 1 MGGAPAATI-----  
LcoWntK 1 MIA-----  
SciWntK 1 MSHSTMRSWYAVSEVRFLLL-----  
LcoWntU 1 -----  
SciWntU 1 MALSP-----  
SciWntM 1 MRQQANRSS-----CRE-----  
ScoWntX3 1 MS-----  
LcoWntH 1 MALLMTVG-----  
SciWntH 1 MGP-----  
ScoWntX4 1 MSSRLFHNP-----  
LcoWntB 1 MAA-----  
SciWntB 1 MAFVSYRTI-----  
SciWntO 1 -----  
HdujWntK 1 MKRLLFSSF-----  
HdujWntJ 1 MMSTEFISC-----CKRS-----  
LcoWntP 1 MCCINNSATPRGE-----IMH-----AKSSC-----  
SciWntP 1 M-----  
ScoWntX2 1 MFKLR-----VM-----  
LcoWntL 1 MSNVERILPCGPRESG-----DECCFASV-----KVSLARCSRSISPEE  
SciWntL 1 MGQ-----  
ScoWntX5 1 MTELA-----CTE-----  
LcoWntS 1 MA-----  
SciWntS 1 MCVCLDERLSSLNLTRPLQADPWPTAMAPASPPAPEQAVPPNVEPSLLATTC-----

|            |    |                                                             |
|------------|----|-------------------------------------------------------------|
| AquWntC    | 10 | -----                                                       |
| PfiWntC    | 12 | -----LLTREYEG                                               |
| HdujWntC   | 3  | -----                                                       |
| AquWntB    | 6  | -----L-----SLRMS---DV-----                                  |
| PfiWntB    | 2  | -----                                                       |
| EmuWntB    | 8  | -----                                                       |
| SlaWntB    | 8  | -----                                                       |
| EfrWntB    | 8  | -----                                                       |
| AquWntA    | 6  | -----                                                       |
| EmuWntA    | 1  | -----                                                       |
| SlaWntA    | 8  | -----                                                       |
| EfrWntA    | 8  | -----                                                       |
| CreWntA    | 6  | -----                                                       |
| PsuWntA    | 3  | -----                                                       |
| CcaWntX1   | 2  | -----                                                       |
| HdujWntL   | 12 | -----                                                       |
| OloWntI    | 5  | -----                                                       |
| OcaWntI    | 4  | -----                                                       |
| CcaWntI    | 7  | -----                                                       |
| LcoWntA    | 4  | -----                                                       |
| SciWntA    | 5  | -----                                                       |
| ScoWnt-i   | 9  | -----                                                       |
| SciWntN    | 9  | -----                                                       |
| ScoWnt-ii  | 9  | -----                                                       |
| SciWntT    | 15 | -----SALI                                                   |
| LcoWntE    | 10 | -----                                                       |
| SciWntE    | 5  | -----                                                       |
| ScoWnt-iii | 5  | -----                                                       |
| LcoWntR    | 7  | -----                                                       |
| SciWntR    | 9  | -----                                                       |
| LcoWntC    | 5  | -----                                                       |
| SciWntC    | 2  | -----                                                       |
| ScoWnt-v   | 2  | -----                                                       |
| LcoWntI    | 9  | -----                                                       |
| SciWntI    | 5  | -----                                                       |
| ScoWnt-iv  | 3  | -----                                                       |
| LcoWntJ    | 6  | -----                                                       |
| SciWntJ    | 3  | -----                                                       |
| LcoWntG    | 7  | -----                                                       |
| SciWntG    | 6  | -----                                                       |
| ScoWnt-vi  | 6  | -----                                                       |
| OcaWnt2X   | 24 | ISSVGIIIPHQTY-----ETSNDHGT-----NAKYI                        |
| EmuWntC    | 2  | -----                                                       |
| SlaWntC    | 1  | -----                                                       |
| EfrWntC    | 22 | -----SAPVRSNSA                                              |
| CreWntC    | 27 | -----RSGAV                                                  |
| CcaWntX2   | 14 | -----TNSHDIT-----KRSN-----                                  |
| LcoWntD    | 12 | -----                                                       |
| SciWntD    | 2  | -----                                                       |
| ScoWntX1   | 11 | -----                                                       |
| LcoWntF    | 6  | -----                                                       |
| SciWntF    | 3  | -----                                                       |
| LcoWntQ    | 33 | ---TNTIYGMMFALNIQQPKAEGNVHPQGKL---GPSPC-----VMSLLTTRF       |
| SciWntQ    | 1  | -----                                                       |
| HdujWntD   | 10 | -----                                                       |
| HdujWntE   | 1  | -----                                                       |
| HdujWntF   | 10 | -----                                                       |
| HdujWntH   | 7  | -----                                                       |
| HdujWntI   | 10 | -----                                                       |
| HdujWntG   | 6  | -----                                                       |
| OloWntII   | 10 | -----S                                                      |
| OcaWntIIa  | 3  | -----                                                       |
| OcaWntIIb  | 8  | -----                                                       |
| OcaWntIIc  | 6  | -----                                                       |
| OcaWnt5bX  | 2  | -----                                                       |
| OcaWnt6X   | 10 | ---SLVPPL-----IAYKASARF                                     |
| LcoWntK    | 4  | -----                                                       |
| SciWntK    | 21 | -----                                                       |
| LcoWntU    | 1  | -----                                                       |
| SciWntU    | 6  | -----                                                       |
| SciWntM    | 13 | -----                                                       |
| ScoWntX3   | 3  | -----                                                       |
| LcoWntH    | 10 | -----R---VPKGGGA                                            |
| SciWntH    | 4  | -----                                                       |
| ScoWntX4   | 10 | -----SRG-----GSSAL                                          |
| LcoWntB    | 4  | -----                                                       |
| SciWntB    | 10 | -----                                                       |
| SciWntO    | 1  | -----                                                       |
| HdujWntK   | 10 | -----LLSAS                                                  |
| HdujWntJ   | 14 | -----SRH---RIQVLPRR                                         |
| LcoWntP    | 22 | -----RPQKVLYS                                               |
| SciWntP    | 2  | -----                                                       |
| ScoWntX2   | 8  | -----                                                       |
| LcoWntL    | 40 | TQGTRAQPTSSLACRSTCSSSEANSSSP-----SQPAMSVRRG---AGWGHASH      |
| SciWntL    | 4  | -----                                                       |
| ScoWntX5   | 9  | ---RHIPLPSLAARPKGALNTSTSRTPRCMTRQPVAEVCAPPAASISRHKRCVFGMMQL |
| LcoWntS    | 3  | -----                                                       |
| SciWntS    | 53 | -----SSCRSARY                                               |

AquWntC 10 --NYVSVLIIIFYCI-----IIISLNKT-----  
 PfiWntC 20 SLYFKHFKMYLVIL-----LMVIFQAQAFSP-----  
 HdujWntC 3 -----FLVIVAMAL-----SIFALVVE-----  
 AquWntB 14 ----GRALLLS-----  
 PfiWntB 2 -----  
 EmuWntB 8 ----DRLLYVSLMCI-----  
 SlaWntB 8 ----GRLLIICLVCL-----  
 EfrWntB 8 ----DRLLLVGLIYI-----  
 AquWntA 6 -----IATAVC-----IIMVFNGC-----  
 EmuWntA 1 -----  
 SlaWntA 8 ----EHAVFIICLVV-----AVHLVISSS-----  
 EfrWntA 8 ----EHAVFIICFLVM-----AVHLVISSSL-----  
 CreWntA 6 -SQWRGYICCAFLLM-----ITVINVOGPN-----  
 PsuWntA 3 ----LSRVIVFALV-----ITVAATKSVFG-----  
 CcaWntX1 2 -----LFFASIVF-----TIFACVTSV-----  
 HdujWntL 12 ----YSLVLIKAVF-----IALLQAPTFSFA-----  
 OloWntI 5 -----IQNVVONEY-----  
 OcaWntI 4 ----FRVVVAAACL-----MAVVFSEIY-----  
 CcaWntI 7 -----  
 LcoWntA 4 ----WQIISLALC-----LVLLAQRALS-----  
 SciWntA 5 ----YRLLSIV-----MAAVLGLLES-----  
 ScoWnt-i 9 ----VKMLSVLAVI-----LVLDLSFSTT-----  
 SciWntN 9 ----FSAVFLLS-----VHRLSAQKHLAA-----  
 ScoWnt-ii 9 ----GCALLISSIC-----LVCESQLNQEAS-----  
 SciWntT 19 QAS-TRILVVCFDM-----IPLLQGTGVS-----  
 LcoWntE 10 ----TLVTLIAGIQ-----SRQSLVFGQVVQRQFVE-----DH-----  
 SciWntE 5 ----VAAFVIALIS-----DRYQVGCQTAHHYRQLAVEVRPSVEQWDIG-EG  
 ScoWnt-iii 5 ----ALVLLISTIA-----TSRLLVCAGQD-----IQVQPS-EEWDL-----  
 LcoWntR 7 ---GRKLAMLFIS-----LVMGLASADSSK-----L  
 SciWntR 9 ----RSFLIITMVV-----VALMPELSSSADVPE-----T  
 LcoWntC 5 ----RREAVIVGVV-----IATFASIESR-----  
 SciWntC 2 ----DRLCVIYFAF-----ISWMSGTESR-----  
 ScoWnt-v 2 ----ARLCFGLAA-----LISLTLTVECR-----  
 LcoWntI 9 ----LLOGITAMVS-----LIWQLEVTNGH-----  
 SciWntI 5 ----KALWTCAVIV-----SVHLIGTCFGH-----  
 ScoWnt-iv 3 ---GKIAWIVLLVV-----AAHLICISTCH-----  
 LcoWntJ 6 ----SCFSEVCSCFQS-----  
 SciWntJ 3 ----IILALA-----IVAVQISTKVQL-----  
 LcoWntG 7 ----MSCRCVMMMI-----LISCCGLS-----  
 SciWntG 6 ----FT--WIAAIL-----VLACARRS-----  
 ScoWnt-vi 6 ----LNTLWSSAIL-----LITYVEMS-----  
 OcaWnt2X 49 VTVEKAMRAVSLG-----IVISISTLFSSE-----  
 EmuWntC 2 -----LCFGLSVAQAP-----  
 SlaWntC 1 -----  
 EfrWntC 31 SQNARTYIIQVAIT-----I AFCIGISFAQGA-----  
 CreWntC 32 SSGCYPRWVWFALII-----I CSCISSSLCDVT-----  
 CcaWntX2 25 -----QFRPRIRTDNIKQAGGQ-----RHCK--DGSCVM  
 LcoWntD 12 ----PAACIYVAIVV-----ILLVQVPGDVSAST-----  
 SciWntD 2 ----LVVATIVA-----SCMVLHEGSTASDSG-----DS-----  
 ScoWntX1 11 ----VVLLSVLALT-----I PCSFSQDL-----  
 LcoWntF 6 ----TPSLIISLTAS-----LIFLVATARAAV-----N  
 SciWntF 3 ----LPLPLIATFAI-----IILAVSTVIGGQALL-----DS--N  
 LcoWntQ 75 SCPNFNYLVTLATF-----I IACLNATALGD-----  
 SciWntQ 1 -----  
 HdujWntD 10 -----TFLLMSR-----  
 HdujWntE 1 ---MSAAMIIVLC-----AFFPVITA-----  
 HdujWntF 10 ----CRHILMVCSY-----IFVCFTANSCSNM-----  
 HdujWntH 7 ----VRATNIVLIIA-----FISSFVAERSALQ-----PHC-----  
 HdujWntI 10 ----LPMVPLLIIA-----LVVLAGEPDRAVAA-----  
 HdujWntG 6 -TTKTALLVITVLLL-----GNSLQQSEA-----  
 OloWntII 11 PLYLDLKMKQTCIVL-----IIFCIAV-----  
 OcaWntIIa 3 ----RLSIPSLFL-----CIVFASA-----  
 OcaWntIIb 8 ----LMYRLISWIFS-----SIVCTSI-----  
 OcaWntIIc 6 -----  
 OcaWnt5bX 2 ----FSVFCICLVF-----GVTAFFLAAASP-----  
 OcaWnt6X 25 IRASVSTLCVSRLLTQQHNTTMPQLFTCLVIAICLSCVRAAC-----  
 LcoWntK 4 ----MPMPWCALFV-----SIIIRMHT-----  
 SciWntK 21 ----ASSVALAALLQ-----LQIFFVATVTAAPP-----  
 LcoWntU 1 -----  
 SciWntU 6 -----TFVVANGTSDAYPT-----  
 SciWntM 13 ----GGCVITVTIP-----LILASVCSRSVAV-----  
 ScoWntX3 3 ----MLLV-----IVILLSTGLCRKT-----  
 LcoWntH 19 VS--SKAPVTLII-----VLLCLST-----  
 SciWntH 4 ----SMISLIIAPLL-----LILLTISA-----  
 ScoWntX4 18 QVRRAPIGISVLL-----LIIILASA-----  
 LcoWntB 4 ----RMLFLVAVYLM-----IQQAVKGRDQEY-----  
 SciWntB 10 ----SSKFTIITIIY-----LIMAITTIQ-----  
 SciWntO 1 -----  
 HdujWntK 15 SRKALRLVCSLIVL-----FGLICETSSN-----  
 HdujWntJ 25 GTMWPSLFTIVVLCN-----LQLVACLSNY-----  
 LcoWntP 30 GRTSLLAVLVVLM-----VQAAIGTGEASVK-----  
 SciWntP 2 ASFVRPLALITLII-----ICATVCTKR-STD-----  
 ScoWntX2 8 ASVVRPLPLIITLV-----ISVCVATAELPPN-----  
 LcoWntL 86 SMRQPVLPILFVFL-----ICISLGSCLRQII-----  
 SciWntL 4 ----RLFLAASV-----VICDLS-----  
 ScoWntX5 65 SLTSTLLVFLALV-----ISADLTA-----  
 LcoWntS 3 GRTLLKCPAALA-----I IILLNAPYSEGG-----  
 SciWntS 61 GSTSLRLLRYLLVP-----LIVLLVQQRHAA-----

|            |     |                                    |                        |                         |
|------------|-----|------------------------------------|------------------------|-------------------------|
| AquWntC    | 29  | -----GF-----G                      | ANSNT-----             |                         |
| PfiWntC    | 46  | -DSVVET-----                       | ETTNTTDP-----          |                         |
| HdujWntC   | 20  | -----                              | -----                  |                         |
| AquWntB    | 21  | -----WA-----F                      | SFTMDE--VT-----        |                         |
| PfiWntB    | 2   | -----                              | -----                  |                         |
| EmuWntB    | 19  | -----W-----                        | VFH-----               |                         |
| SlaWntB    | 19  | -----W-----                        | VFH-----               |                         |
| EfrWntB    | 19  | -----W-----                        | MFH-----               |                         |
| AquWntA    | 20  | -----LASWW-----S                   | GVYNDL-----            |                         |
| EmuWntA    | 1   | -----                              | -----                  |                         |
| SlaWntA    | 28  | -----SSTSWW-----S                  | SVSSLS-----            |                         |
| EfrWntA    | 29  | -----SSPSWW-----S                  | SVSSLS-----            |                         |
| CreWntA    | 31  | -----STSWW-----S                   | VGITDCGK-RVT-----      |                         |
| PsuWntA    | 24  | -----GIGWW-----S                   | GVSECS-----            |                         |
| CcaWntX1   | 19  | -----YGSWW-----E                   | MARDVAD-----           |                         |
| HdujWntL   | 34  | -----TATYW-----A                   | NLATIA-----            |                         |
| OloWntI    | 14  | -----                              | EPFFLSL-----           |                         |
| OcaWntI    | 23  | -----                              | KPFFFISC-----          |                         |
| CcaWntI    | 7   | -----                              | -----                  |                         |
| LcoWntA    | 24  | -----TTTGY-----S                   | FPYHTAA--AL-----       |                         |
| SciWntA    | 22  | -----GLSNA-----E                   | FPYHTSA--AL-----       |                         |
| ScoWnt-i   | 29  | -----MSEGT-----L                   | FPYHTSA--AL-----       |                         |
| SciWntN    | 29  | -----TTLDDPDL-----R                | PHYHIAT--AM-----       |                         |
| ScoWnt-ii  | 31  | -----TSLNNSDL-----S                | FPYHIAT--AL-----       |                         |
| SciWntT    | 42  | -----QSLFF-----S                   | PFHTAS--GLASRSQHASRILS |                         |
| LcoWntE    | 39  | ----VGTAPS-----                    | VTPTAGNV-----          |                         |
| SciWntE    | 48  | ESSTTGNATT-----                    | TDSTSS--S              | PSAVGGHDPAE-----        |
| ScoWnt-iii | 38  | ----QGNAST-----                    | -----SA-----           |                         |
| LcoWntR    | 32  | -----TLPQ-----S                    | GLDGLSSW--S            | VPFQTV--ALKSINNDH-----  |
| SciWntR    | 36  | TEETIGRISQ-----                    | TG--FLSQW--R           | VPFQAKV--ALSEINDPP----- |
| LcoWntC    | 26  | -----                              | LPSTVKS--I             | GAL-----                |
| SciWntC    | 23  | -----                              | LPSAIDR--I             | MGSL-----               |
| ScoWnt-v   | 22  | -----                              | LPSTINT--I             | MGSLN-----              |
| LcoWntI    | 30  | -----                              | FP                     | SAIEM--VN-----          |
| SciWntI    | 26  | -----                              | FP                     | SAIEA--VT-----          |
| ScoWnt-iv  | 25  | -----                              | FP                     | SAIEL--VK-----          |
| LcoWntJ    | 18  | -----                              | R                      | GFHSM--AL-----Q         |
| SciWntJ    | 21  | -----TSGSS-----S                   | SFHSM--AI-----Q        |                         |
| LcoWntG    | 25  | -----                              | HQSVW--R               | TGISISSK-----           |
| SciWntG    | 22  | -----                              | EQSVW--M               | TGISISSK-----           |
| ScoWnt-vi  | 24  | -----                              | HQTVW--R               | TGISISSK-----           |
| OcaWnt2X   | 75  | -----                              | A                      | QIKGSS-----             |
| EmuWntC    | 13  | -----                              | DGTSGGN-----           | TFSSIPG-----            |
| SlaWntC    | 1   | -----                              | -----                  | -----                   |
| EfrWntC    | 58  | -----                              | DTTGGTTTA--S           | TPTSTAS-----            |
| CreWntC    | 59  | TSNSAGTTSAP-----                   | A                      | TTPIITT--PMT-----       |
| CcaWntX2   | 53  | NDQGSNGNGFDNDDE-----               | DEEGSADSWLPLEM         | SWSVKEV-RVPSN-----      |
| LcoWntD    | 37  | -----                              | NLESWW--T              | MANKIQL-----            |
| SciWntD    | 27  | -----                              | PAQNGDLETWW--T         | MANVIL-----             |
| ScoWntX1   | 30  | -----                              | RSLETWW--T             | MANQVRL-----            |
| LcoWntF    | 31  | PEGTVLSSSEYEGLPPLRGV-PSRRQDWW----- | S                      | SRLIDV-----             |
| SciWntF    | 32  | SDDRALSTSQPPPALP--GIAAYRKLQWW--S   | S                      | SRLIND-----             |
| LcoWntQ    | 101 | -----TSMGVEEDSC-----               | DLYQATKWW--S           | MARLINR-----            |
| SciWntQ    | 1   | -----                              | -----                  | -----                   |
| HdujWntD   | 17  | -----                              | S                      | ALQGLV-----             |
| HdujWntE   | 19  | -----                              | QGFW--S                | ALEELT-----             |
| HdujWntF   | 33  | -----CS--NDLHEV-----               | L                      | SVNPKL--VS-----         |
| HdujWntH   | 33  | -----DSC--NEFGFV-----              | K                      | SVDPDL--VD-----         |
| HdujWntI   | 33  | -----                              | GENTRYW--A             | YHEDVQ-----             |
| HdujWntG   | 30  | -----                              | ALSTWW--T              | MANIPNA-----            |
| OloWntII   | 33  | -----                              | QATWL--D               | GQRLID-----             |
| OcaWntIIa  | 19  | -----                              | TGTWL--E               | GQKLIE-----             |
| OcaWntIIb  | 26  | -----                              | SATWL--E               | GQKLDE-----             |
| OcaWntIIc  | 6   | -----                              | -----                  | GQKLDE-----             |
| OcaWnt5bX  | 24  | -----                              | KPPAWW--Q              | FGEYLDK-----            |
| OcaWnt6X   | 67  | -----                              | APPAWW--Q              | FGEYMKD-----            |
| LcoWntK    | 23  | -----                              | -----                  | -----                   |
| SciWntK    | 47  | -----                              | QWW--                  | MYG-----                |
| LcoWntU    | 1   | -----                              | -----                  | -----                   |
| SciWntU    | 20  | -----                              | -----                  | -----                   |
| SciWntM    | 36  | -----                              | ASIFWKQ--              | IYE-----                |
| ScoWntX3   | 20  | -----                              | HAAAWQE--              | AFR-----                |
| LcoWntH    | 38  | -----                              | CRTANAIWWEED--         | -----                   |
| SciWntH    | 21  | -----                              | CNTANGIWWDT--          | A-----                  |
| ScoWntX4   | 39  | -----                              | WCRTTNAIWWNP--         | E-----                  |
| LcoWntB    | 29  | -----                              | -----                  | PSRNI-----              |
| SciWntB    | 29  | -----                              | -----                  | APGRRRP-----            |
| SciWntO    | 1   | -----                              | -----                  | -----                   |
| HdujWntK   | 40  | -----                              | -----                  | RTPRTSNP-----           |
| HdujWntJ   | 51  | -----                              | -----                  | SKQSVPA-----            |
| LcoWntP    | 57  | -----                              | PRNHKTF--D             | WATLKD-----             |
| SciWntP    | 28  | -----                              | GRLGQEPF--D            | SRTVQR-----             |
| ScoWntX2   | 35  | -----                              | GGIKAERF--D            | ARTVQK-----             |
| LcoWntL    | 113 | -----                              | -----                  | -----                   |
| SciWntL    | 20  | -----                              | -----                  | W-----                  |
| ScoWntX5   | 86  | -----                              | -----                  | -----                   |
| LcoWntS    | 30  | -----                              | KRYSYYWW--D            | SLLRSEG-----            |
| SciWntS    | 88  | -----                              | KTYSFYWW--D            | SLLRSEG-----            |

\*

|            |     |                  |                  |               |                 |           |
|------------|-----|------------------|------------------|---------------|-----------------|-----------|
| AquWntC    | 39  | ---ATP-----      | VYLN-NQFTCHN     | T-----        | NAN-QRIM        |           |
| PfiWntC    | 60  | ---SSR-----      | SLS-APLFTCRDL    | R-----        | TRS-QRDL        |           |
| HdujWntC   | 20  | -----            | NG-AAIAKQDQY     | -----         | DLIYS-QRQF      |           |
| AquWntB    | 33  | -----            | PF-PNHIICLY      | P-----        | GLNDV-QRDL      |           |
| PfiWntB    | 2   | -----            | -----            | -----         | -----           |           |
| EmuWntB    | 23  | ---AAQ-----      | TF-SPDLICLT      | P-----        | SLNAQ-QKAL      |           |
| SlaWntB    | 23  | ---IAQ-----      | PF-SPDLICLT      | P-----        | SLNAQ-QKAL      |           |
| EfrWntB    | 23  | ---VAQ-----      | PF-SPDFICLT      | P-----        | NLNAQ-QKAL      |           |
| AquWntA    | 33  | -----            | SERV-VDSTP       | CESLT-----    | NILNSS-QQTF     |           |
| EmuWntA    | 1   | -----            | -----            | -----         | -----           |           |
| SlaWntA    | 42  | ---NPS-----      | AD-TSTVDCSNST    | -----         | YLSPF-AQAT      |           |
| EfrWntA    | 43  | ---TPS-----      | AN-PNSIDCINNST   | -----         | FLSPF-AQEV      |           |
| CreWntA    | 48  | -----            | TAN-STCPNCAK     | Q-----        | QDQWESAE-QASK   |           |
| PsuWntA    | 37  | -----            | LGSK-APCETCAK    | T-----        | KNYNLTDR-QKEA   |           |
| CcaWntX1   | 32  | -----            | RD-MDRLHCDR      | E-----        | YDYGLTKE-QVDM   |           |
| HdujWntL   | 47  | -----            | ATE-GESGVCNR     | -----         | SALTQS-QYLQ     |           |
| OloWntI    | 22  | ---GSK-----      | QL-KQRVDCVS      | -----         | PMTDA-QREW      |           |
| OcaWntI    | 31  | ---AVD-----      | DL-KGKELCPR      | -----         | TLPDE-QFRL      |           |
| CcaWntI    | 7   | -----            | -----            | -----         | DVSLR-----      |           |
| LcoWntA    | 39  | ---STV-ET-----   | GP-IRKSTCKR      | P-----        | GLTDK-QVKW      |           |
| SciWntA    | 37  | ---ATS-GL-----   | RP-IRRGDCKR      | T-----        | GLIEG-QFQW      |           |
| ScoWnt-i   | 44  | ---STS-GL-----   | AP-VRKSSCKR      | E-----        | GLTVA-QVKW      |           |
| SciWntN    | 47  | ---SSA-EL-----   | EP-IRKGNCKR      | E-----        | GLSTS-QVDW      |           |
| ScoWnt-ii  | 49  | ---SAS-EA-----   | EP-IRKGSCKR      | F-----        | GLTQR-QVEW      |           |
| SciWntT    | 69  | LSMSSS-IK-----   | KD-ITKETCRO      | V-----        | GLTSK-QFRW      |           |
| LcoWntE    | 53  | ---NAG-----      | TPEES-DRRAACRF   | P-----        | GLTQK-QRLW      |           |
| SciWntE    | 77  | ---ETD-GI-----   | EP-DGRAACSF      | P-----        | GLTER-QRLW      |           |
| ScoWnt-iii | 46  | ---EHG-GG-----   | EP-DSRAACHF      | P-----        | GLTER-QRLW      |           |
| LcoWntR    | 62  | ---SDDFDLSQ----- | LAAPVNE-TDRALLKT | V-----        | GLTRRE-QFTW     |           |
| SciWntR    | 70  | ---GQDFSLHD----- | LVRTAND-TDDAQLNA | L-----        | GLSRE-QQAW      |           |
| LcoWntC    | 39  | ---GSE-----      | AI-TRNAFCNR      | Q-----        | GLSDA-ESKW      |           |
| SciWntC    | 36  | ---ETK-----      | AI-TQTRFCDK      | N-----        | GLTQL-QKEW      |           |
| ScoWnt-v   | 36  | ---DSR-----      | VI-SHQRFCKN      | N-----        | GLTAA-QATW      |           |
| LcoWntI    | 40  | ---KQR-YL-----   | NAA-VEKRLCRN     | P-----        | GLTDR-QRSW      |           |
| SciWntI    | 36  | ---RQR-FL-----   | DET-VQRRLCRN     | P-----        | GLTDR-QRSW      |           |
| ScoWnt-iv  | 35  | ---KQR-YL-----   | DET-VQRRLCRN     | P-----        | GLSDQ-QRSW      |           |
| LcoWntJ    | 29  | ASQSMH-VL-----   | DC-LGPAQCQH      | P-----        | GLTES-QRLW      |           |
| SciWntJ    | 37  | IVQSMR-AL-----   | KT-LGPEQCEH      | P-----        | GLSDH-QKAW      |           |
| LcoWntG    | 39  | ---TLE-RL-----   | QC-VVTKTCNS      | P-----        | GLTIR-QRAF      |           |
| SciWntG    | 36  | ---TLD-PL-----   | EG-ALQKTCSS      | A-----        | GLTHR-QRMF      |           |
| ScoWnt-vi  | 38  | ---SLD-PL-----   | QC-VIEKTCGS      | V-----        | GLTQR-QRMF      |           |
| OcaWnt2X   | 83  | ---SEE-GL-----   | RQTKGGGI-RPAD    | ICKFP-----    | GLSRS-QVRF      |           |
| EmuWntC    | 28  | ---SPT-----      | PVQ-INMLECLS     | AF-----       | DQQAQ-AVLV      |           |
| SlaWntC    | 1   | -----            | -----            | -----         | -----           |           |
| EfrWntC    | 75  | ---SAT-----      | PVQ-INMMECS      | SAF-----      | DQQAQ-TVLV      |           |
| CreWntC    | 82  | ---STSTSL-----   | PTPQR-FNIADC     | VTSF-----     | DSSDQ-RFYI      |           |
| CcaWntX2   | 96  | ---KTKSSLIG-DRN  | TTVVHLVELDATK    | QHYSRTVVKCRD  | VTQLV-----      | NSDL      |
| LcoWntD    | 51  | ---PQG-----      | KF-HVFPGCDK      | N-----        | LMTRN-QKLS      |           |
| SciWntD    | 47  | ---PQG-----      | NM-GTFPGCEH      | N-----        | LMTDN-QBRA      |           |
| ScoWntX1   | 45  | ---PAG-----      | TLGPVFPQCQ       | LK-----       | LLTEN-QRAA      |           |
| LcoWntF    | 69  | ---NTR-QL-----   | ASA-SSVEQCNS     | P-----        | LSRR-QREL       |           |
| SciWntF    | 68  | ---RTG-RL-----   | KSA-SSVRACQR     | P-----        | LSKR-QKQL       |           |
| LcoWntQ    | 128 | ---TSL-----      | EL-KTFSSCDD      | L-----        | LTDL-QRGE       |           |
| SciWntQ    | 1   | -----            | -----            | -----         | MSAG-QASF       |           |
| HdujWntD   | 26  | ---QPN-----      | GH-LAPANCS       | EYL-----      | IKGVQPH-QYEV    |           |
| HdujWntE   | 31  | ---AAD-----      | GQ-FVRPNCVSY     | H-----        | SSGLTQE-QYQL    |           |
| HdujWntF   | 51  | ---RSG-SL-----   | VE-RGFKNCFE      | F-----        | GVLTON-QLNM     |           |
| HdujWntH   | 52  | ---ANG-----      | IVV-NKLADCME     | YD-----       | EVLSPQ-QMSV     |           |
| HdujWntI   | 47  | -----            | VP-LSHQRCSE      | Q-----        | LAGVLAPS-QHLL   |           |
| HdujWntG   | 44  | ---DL-----       | SKPDGSS-LIPLD    | CKAHQ-----    | ASMSAA-QFQL     |           |
| OloWntII   | 46  | ---EEI-RLRGP     | DFDPDIV-----     | HIPEEDI-KPTLD | CYDWN-----      | MTTG-QFQI |
| OcaWntIIa  | 32  | ---EEI-KNRPP     | PGYDPTIV-----    | HTKENDV-KVTLD | CSSVN-----      | MTSA-QQKM |
| OcaWntIIb  | 39  | ---ERQ-KLIPP     | PGDPTII-----     | RSKENQI-KVALG | CSSVN-----      | MTLP-QHQI |
| OcaWntIIc  | 14  | ---ERQ-KLIPP     | PGDPTII-----     | RSKENQI-KVALG | CSSVN-----      | MTLP-QHQI |
| OcaWnt5bX  | 38  | ---QLG-KY-----   | QV-LTTIPCSY      | F-----        | LSPR-QREM       |           |
| OcaWnt6X   | 81  | ---QAS-KY-----   | GI-WTSIPCEK      | F-----        | LPQT-QHDI       |           |
| LcoWntK    | 23  | ---SSE-----      | SVL-AVKDLCND     | T-----        | SSQEDGA-SFVI    |           |
| SciWntK    | 53  | ---SSQ-----      | SVR-TLREQC       | SEWN-----     | SSSLPDDIA-SQLI  |           |
| LcoWntU    | 1   | -----            | -----            | -----         | -----           |           |
| SciWntU    | 20  | -----            | RFS-HFPFRCK      | VRE-----      | GAPLE-SHSQ      |           |
| SciWntM    | 46  | ---GSS-----      | QA-WQNGRC        | DPEL-----     | EVSQ-QSQH       |           |
| ScoWntX3   | 31  | ---GAG-----      | QA-WQNGKCD       | ENL-----      | DVSL-QSPQ       |           |
| LcoWntH    | 50  | ---AED-NL-----   | FN-LHQHCAED      | L-----        | AANRTS-PLLI     |           |
| SciWntH    | 33  | ---ASD-SL-----   | HK-QHAKHCPE      | -----         | SAKLNS-SLQL     |           |
| ScoWntX4   | 52  | ---AAD-SL-----   | HR-LHYKHCPE      | -----         | GSKHNS-SLHL     |           |
| LcoWntB    | 35  | -----            | TNWELCATRE       | -----         | TAE-GSEL        |           |
| SciWntB    | 37  | ---HNN-----      | VNM-TFMDIC       | SKMD-----     | TVT-AQVR        |           |
| SciWntO    | 1   | -----            | -----            | -----         | -----           |           |
| HdujWntK   | 48  | -----            | YKTCYQYR         | -----         | NYRPTSY-QLRY    |           |
| HdujWntJ   | 59  | -----            | SLGTNCSAWI       | -----         | QRYNLTAQ-QSHL   |           |
| LcoWntP    | 73  | ---ISG-----      | -----            | -----         | RRFADQFPH-EVSV  |           |
| SciWntP    | 44  | ---AVR-----      | -----            | -----         | RPYFRQRQY-EKSV  |           |
| ScoWntX2   | 51  | ---IAG-----      | -----            | -----         | RRYFDTHEN-DRKI  |           |
| LcoWntL    | 113 | -----            | QPSVDCPRNM       | SAEDMFQ       | LIEG-QKRV       |           |
| SciWntL    | 21  | -----            | AVF-VTRSTCD      | RDTQPIHDMVEA  | LNSE-QRKI       |           |
| ScoWntX5   | 86  | -----            | ASL-IASRRCD      | SVTRTIDDMVGA  | LNER-QRRF       |           |
| LcoWntS    | 47  | -----            | -----            | -----         | VTGLDYTGI-QKVL  |           |
| SciWntS    | 105 | -----            | -----            | -----         | HHHADYUIGL-QKQL |           |

```

* * *
AquWntC 63 CFT----TP---GLLK-ATVDAEQ-----LARKECNQLEYE--RWNCSGFA---
PfiWntC 83 CYD----TP---GLLE-ITIKSEQ-----LAKEECEFWFKDH--QWRCFGFS---
HdujWntC 41 CRV----NR---ELLP-ITKFAEA-----SAMRECQFLFKSN--RWNCSGFG---
AquWntB 54 CIR----YP---KLVPIITQEVPP-----LFYSECREQFKYE--RWNCSSETI---
PfiWntB 2 --E----YP---AAMA-ITQEIAD-----ATHDECIIDQFKND--RWNCTEVI---
EmuWntB 47 CRQ----LP---KAMN-VIVNATL-----AYTDECNWQFRKD--RWNCSVGG---
SlaWntB 47 CRQ----LP---KAMN-VIVNATL-----EYADECNWQFRRD--RWNCTSGG---
EfrWntB 47 CRQ----LP---KAMN-VIVNATL-----AYADECNWQFRRD--RWNCTSGG---
AquWntA 57 CNY----NR---KIVN-SLAIGTR-----RGTIVACQONFANW--RWNCTTFT---
EmuWntA 1 -----
SlaWntA 67 CAS----DK---KIVL-ATARGTK-----AAIVQCCQMEFANS--RWNCTTFL---
EfrWntA 68 CAK----DK---NIIIL-AVSRGAK-----AAIIQCQSEFGNL--RWNCTTFL---
CreWntA 73 CRS----EP---AIRD-SLISNGAR-----AAIIDCQCFRFNES--RWNCSSTLF---
PsuWntA 63 CIQ----DP---SQVQ-ATARGTR-----KAIIDCQAVFSESR--RWNCSSTFS---
CcaWntX1 56 CKSFR---YY---PLMS-DVFFFAE-----MALKQCKRFQKHN--RWNCSWTAS---
HdujWntL 68 CLS----NR---DTVY-STALGVE-----LGTIAQCRVVFVNN--RWNCSATG---
OloWntI 44 CRW----ND---DIVG-LITVDGAT-----KGLDECEYRFQKR--RWNCTSSE---
OcaWntI 53 CRW----ND---VIMA-KFVDCAR-----IGLRECEYQFRNR--RWNCTAAK---
CcaWntI 12 -----LFGIVS-----DFSTN-----
LcoWntA 65 CKS----HY---VFLQ-PIVSGTK-----LGLDECKRFRFGSR--RWNCSPTDL---
SciWntA 63 CKT----HS---VFMQ-PIVSGAK-----LGLAECQRFFSNR--RWNCSPTDQ---
SocWnt-i 70 CKS----HH---VFMQ-PIASGAK-----LGLAECRFRFSDR--RWNCSPTDR---
SciWntN 73 CKK----NS---VFFR-PIVIGTR-----LGLNECKRFRFARR--RWNCSPTDQ---
SocWnt-ii 75 CKK----HY---DFLQ-PIVIGTR-----LGLDECKRFRFALR--LWNSCPIDR---
SciWntT 98 CRK----NY---ELLA-ATGDGAR-----LGLAECQRFREFKR--RWNCSPIAQ---
LcoWntE 80 CLD----NY---IFLE-PIASGAQ-----IAGNQCRKQFSDR--RWNCSPTNR---
SciWntE 103 CRD----NY---VFLE-PIASGAQ-----IALAQCRKQFADR--RWNCSPTDN---
SocWnt-iii 72 CLD----NY---VFLE-PIATGAQ-----LALGQCRKQFADR--RWNCSPTHN---
LcoWntR 96 AQR----YN---KLLQ-PIVSEGAT-----LALRECHFRFKDE--RWNCSPIHK---
SciWntR 103 AKN----NT---LLVG-PIVADGAV-----LGLRECHFRFKYE--RWNCSPIHR---
LcoWntC 63 CRK----YT---PFLP-ATGMGAD-----LALKECKRFRFYD--RWNCLDD---
SciWntC 60 CHK----YT---PFVP-ATGMGAN-----LALKECKRAFQYE--RWNCTMDD---
SocWnt-v 60 CHK----YT---AFLP-ATGLGAN-----LAMKECKRAFQYE--RWNCSMDD---
LcoWntI 63 CRS----HL---PFVG-PIAQQAT-----LGLSECRQFQFYE--RWNCSPLNY---
SciWntI 67 CRT----HL---PFVG-PIAQQAR-----LGLRECRQFQFME--RWNCPIND---
SocWnt-iv 62 CRA----HL---PFVR-PIAQQAN-----LGLSECRQFQFME--RWNCPIND---
LcoWntJ 58 CRH----HH---VFMQ-PIARGTL-----LGLDECSRFQFQ--RWNCPVND---
SciWntJ 66 CRQ----HH---VFMQ-PIAQQTR-----LGLSECSRFQFHYQ--RWNCPMNN---
LcoWntG 65 CMN----HS---DLMD-PIDQGAQ-----LGREECSEFRMSGR--RWNCPKNN---
SciWntG 62 CLT----RS---ELMD-PIDQGAN-----LGRLECSFRMSKK--RWNCPSPDD---
SocWnt-vi 64 CLA----RS---QLMD-PIVQGAN-----LQOECHFRMSGR--RWNCPKNN---
OcaWnt2X 115 CRR----RP---WLMT-SLGNQFK-----AARNECRELFARADV--RWNCSSTSN---
EmuWntC 53 CNN----YP---DLYA-VIKFAEQ-----VGRDECOQAFQGS--RWNCSSTFS---
SlaWntC 1 -----
EfrWntC 100 CNN----YP---DLYP-VIKFAEQ-----VGRDECOQAFQGS--RWNCSSTFS---
CreWntC 112 CLN----HK---ELFP-LIKFAEQ-----VCKSTCEEDFEHE--RWNCSSTFSL---
CcaWntX2 140 CER----YP---TVLP-ATIQGVQ-----LAVEETIILLKDR--RWDGYALK---
LcoWntD 75 CDN----GSAQGVNRMT-VLGRAAL-----ATKIECQKQFASK--RWNCSSTFE---
SciWntD 71 CDG----GSDLGVRMT-ILARASL-----ATTLECKQFQAAQ--RWNCPKFA---
SocWntX1 70 CNQ----GSEIGIARMT-VLARASL-----ATTMECKQFQFQ--RWNCEFTL---
LcoWntF 95 CNSTRVGEGS---ALMT-VAARASL-----AAVRECOQFQFADN--RWNCSQHF---
SciWntF 94 CTSRRSGYGP---ALVT-IAARASL-----AAVRECOQFQFQDR--LWNCHEHFE---
LcoWntQ 151 CRQ----DASQGYGRM-VMARASL-----ATARECSRFQFQDR--RWNCSSTFQ---
SciWntQ 9 CSD----DARLGFERTR-VMARASL-----ATTRECARQFADR--RWNCSPSFL---
HdujWntD 53 CMN----NS---YLVS-ATTKGLR-----RATASQSTFKNN--LWNCATAYK---
HdujWntE 58 CQE----DG---LVLA-AVSKGLR-----RAISDQSNFAHQ--RWNCSAFE---
HdujWntF 78 CTR----DP---DYLS-CFALGMR-----RAVQWCGRFVFNQS--RWNCSHAV---
HdujWntH 78 CLG----KGS---RYLS-CFALGMR-----KAVNWCGRFVFNQS--RWNCSHAV---
HdujWntI 71 CVN----RP---QVLR-AVVRGLQ-----RAVHYCQFTRFRS--PWCQPLDA---
HdujWntG 73 CSD----NP---HLVT-AVVLGK--RATHFCQQQFQKQ--CWDQASFV---
OloWntII 86 CEK----SEK---GLLV-ATAQGIN-----AAVYTCRDFENR--QWNCSTDP---
OcaWntIIa 72 CQS----AEK---GLIV-ATAQGIN-----AAVYSCRFNMANH--SWNCPVPG---
OcaWntIIb 79 CVN----AEK---GFPA-AVAKGIN-----AATYVCRFDMKDF--PWNCPPIG---
OcaWntIIc 54 CVN----AEK---GFPA-AVAKGIN-----AATYVCRFDMKDF--PWNCPPIG---
OcaWnt5bX 63 GENP----RNR---DLMI-KLGLAVN-----LAVQVSNETFANR--RWRSHYTG---
OcaWnt6X 106 CANP----PNR---ELII-RLAVAVN-----VAEQACTQTFAGR--RWRCHYTG---
LcoWntK 51 CPL----AN---DTVW-QISRSSY-----EAVENCQRLFRNH--RWNCSSTSS---
SciWntK 82 CPL----SE---RTVE-EIEKSAY-----QAVWQCRVAFQKH--RWNCPNTT---
LcoWntU 1 -----RLWT-TIQRGLD-----QCIEECQKVMKTG--TAMTQPVTR---
SciWntU 42 CLR----RDE---PLWT-TIQRGR--EGIAQCRKVMKDN--TNSCAVEQ---
SciWntM 69 CIL----SH---PLLKPVRESLR-----IGIDLCKLRFQK--RWNCSINP---
SocWntX3 54 CIL----SH---PLLRPVLQYSLQ-----EAVIQCLKLFHDQ--RWNCSVNA---
LcoWntH 77 CRL----SG---DEMT-SLIHGAR-----EGLRQCQFLNNE--RWNCTSSD---
SciWntH 58 CRL----SG---EELT-SLMKGAA-----GGTFDCQMLMASQ--RWNCSSSD---
SocWntX4 77 CKL----SG---GELS-SLMRGAA-----KGIYECQMQASTQ--RWNCSSSN---
LcoWntB 52 C-----FARNGVV-----KAMALCKNQFKNE--RWNCPSSS---
SciWntB 60 C-----FARRGAV-----LAVNTCQDAFQOE--RWNCPSSS---
SciWntO 1 -----MAVQECRTRFAQR--QWNCVVKP---
HdujWntK 67 CTN----DH---ALFENVASVGVKLPSSPTPLFEEECQYWMAVE--RWNCSGK---
HdujWntJ 81 CRT----NH---SLFESVATICISSDVEAPS--LFECECQYWMED--RWNCSGK---
LcoWntP 89 VRRYT--SSE---SWKA-VFRNASK-----FTIEQCRCAMGKS--RWNCTTSS---
SciWntP 60 LEHHM---TE---SWLE-ITKEASE-----WLSSHACQCFGRN--MWNCTTSS---
SocWntX2 67 LLHM---SE---QWLA-ITRESSE-----WVTGHCMQFAKS--RWNCTSTSS---
LcoWntL 139 LQD----SR---NSTL-LFSDGES-----CAIQACKKWTKGT--RWNCHMNE---
SciWntL 51 LAQ----HA---IN-ATTP-IMYRGEY-----CAVHVCQELMQGT--RWNACHLNH---
SocWntX5 116 LLV----NANLT-SCTP-ITSRGER-----CAVSLCQELMQGT--RWNCHYLED---
LcoWntS 60 IDA----GA---VNNT-LIDRERV-----LFLSNCLTRMTNR--RWNCSRNMPQ---
SciWntS 118 VDG----GA---VNRS-LIHTARE-----YFLKECVIRMHPM--QWNCSTRTQ---

```

```

AquWntC      100 -----VITPSN---VTKYATAETAALHSLMSAALAHVVTTRDCRFNG--M---QC
PfiWntC      120 -----MLTPSN---VTKRASKESSEFLYAIISATLHTITGACKDEI--I----DC
HdujWntC     78 -----VLRSSY---TKEVATAETAFLALMSAVLAKNIAQACKEGS----TSLC
AquWntB      92 -----PPI-AGDLS-KDKRRLSKETAFTYALTSAIMVRVITKACSDGR----LQNC
PfiWntB      37 -----PPI-IGDPY-SDLKRSKTESAFVHALTSAAITVHVITKACSDGR----IINC
EmuWntB      84 -----IPV-FASK---LAFNRSREAAFTYALVSAITAHSITSACANSL--L--GSAC
SlaWntB      84 -----IPV-FASK---LAFNKSRETAFTYALTSAVTVHAIITTACSNNI--L--GAAC
EfrWntB      84 -----IPV-FASR---WAYNKSRETAFTYALTSAITAHSITTACANGL--L--GSAC
AquWntA      94 -----GENLFGA---FVKNNTRETAFTVINALLTAGAERQIALDCRDEK----LPNC
EmuWntA      1 -----RGRS-----LNC
SlaWntA     104 -----GQYLFCK---FHTLGTAEESAAYVYFMSAGAAHELAQACRTGA----VSNC
EfrWntA     105 -----GQHLFGK---FHTSTGTESAAVYVYFMSAGAAHELAGACRTGA----VVNC
CreWntA     110 -----GNHLFGSF---VATGKTRETGVNLNAYFAACAVSAIAEDCHNQ-----IASC
PcuWntA     100 -----GENLFCRF---VTSRTRETAFTVFAFLSAGAIQEVAEACHEQR----LLNC
CcaWntX1     95 -----TGPLFCGA---LKNGTREAAAFVQALFTAVLSAKVTTKCSNPR--FHEPLTC
HdujWntL    105 -----PHERSFAD---ATSRGTETAFTVQAILSAGMMSLVSRVCKEGR----LLRC
OloWntI      81 -----RDH-FRA---ATSRGTRESAFTYAVTSAAIWVSVSRCALRE--D--LTQC
OcaWntI      90 -----ADH-FEK---VMAKGSREAAFTYAVASAAITWVSISRECALSD----LPEC
CcaWntI      23 -----VVHVLKLI---VLLSATRETAFTVFAMTVAGIIVSVSRECALGD----LREC
LcoWntA     102 -----PDI-FAK---AITTANPEAAAFVHGIESAGITLAIARTCSRGD--A--LSHC
SciWntA     100 -----PEV-FAK---ALETANPEASVFSIQSAGITLAIARTCSRGD--A--LKFC
SciWnt-i     107 -----QSV-FRK---AITTANPEAAAFVHGIESAGITLAIARTCSRGD--A--LSHC
SciWntN     110 -----PNI-FSK---VINTATPEAAAFVHGIESAGITLAIARTCSRGD--A--LSHC
ScoWnt-ii    112 -----PNV-FRR---VLDTANPEAAAFVHGIESAGITLAIARTCSRGN--T--VKHC
SciWntT     135 -----PSI-FSK---ILEAASKETAFVHSIQSAGITLAIARTCSRGE--A--STLC
LcoWntE     117 -----PAV-FSK---LYDRASRETAFTVHAIQSAGVTLTVARTCSRGO--A--PGWC
SciWntE     140 -----PAV-FSK---LYDKGSQETAFTVHSIQSAGATLAIARTCSRGH--A--PRWC
ScoWnt-iii   109 -----PAV-FCK---LYDRGSRETAFTVHAIQSAGATLAIARTCSRGH--T--PRWC
LcoWntR     133 -----PAS-FVK---LFKIGGPEAAFLVYAMQAGMSLAVARTCSQGD--T--RGAC
SciWntR     140 -----SET-FQK---VFMIGGREAAFLYAIQAGISLAVARTCSKGG--T--GGSC
LcoWntC     100 -----ER-YRH---LASFESRETAFTVDSIVSAGVMMASRGTCSKGN--L--TKYC
SciWntC      97 -----SS-FQH---VSSFQSKETAFTVDAIVSAGVMMASRGTCSRGG--L--TKYC
ScoWnt-v     97 -----AS-FTH---VSSFESKETAFVDAIVSAGVMMASRMTCKGQ--L--VRYC
LcoWntI     104 -----STANFN---IMSTGSRREAAVSSIQAGITLAIARTCSSGNST--ADF
SciWntI     100 -----STNYHF---IMSTGSRREAAVSSIQAGITLAIARTCSAGN--V--TRFC
ScoWnt-iv    99 -----STANFQY---IMATASREAAVVASIQAGVTLAIARTCSGN--V--TRFC
LcoWntJ      95 -----SRA-IET---ALNLRATAETAFTQSIQSAGIMQAIARTCSRGN--I--TKWC
SciWntJ     103 -----SMA-IQN---ALRLDTAEAAFLQSIQSAGMMQAVARVCSRGN--V--TEWC
LcoWntG     102 -----TDV-LKA---ALVKGYKESAFVQAIQSSGVVQGIARICCSAGK--A--NKHC
SciWntG      99 -----SVL-LKA---ALVKGYRESAFVQAIQSSGVVQAVARVCSGK--A--EKHC
ScoWnt-vi    101 -----TVL-LKA---ALVKGYIESAFVQAIQSSGVVQALARVCSGK--V--SKHC
OcaWnt2X    154 -----GAFV-FSP---LFRSSSKEAAAFWAISAGVVCVAVRDCMKGR----LTNC
EmuWntC      90 -----ILKSSN---LVKKDIETAYIRALQVAVIAHTVAKACGTQT----LVSC
SlaWntC      1 -----YIRALQSAVIAHTVAKACRTGT----LVSC
EfrWntC     137 -----ILKPPS---LVRKDIVEYAYIRALQVAVIAHTVAKACRTRT----LASC
CreWntC     150 -----LKQPSITKGDYIYKESAYVYSLMAVIAHTVAMGCVVEE----IFNC
CcaWntX2    177 -----KKQ-VGEN---LIRQATKESAFTHAIISAGITHVVTTKSGSKHL----IEGC
LcoWntD     116 -----RGPLFCRH---LLYNSKESAFVHTLMAASVAHEVAKACSEGR--L--EGDC
SciWntD     112 -----SGPLFCRH---LLHNSREAAAFVHALMAASVAHESAKACSEGR--L--GRDC
ScoWntX1    111 -----EGPLFCRH---LLYNGTREAAAFVHALMAASVAHESAKACSEGR--L--LGDQ
LcoWntF     137 -----SGPLFCRA---LKHRTKEAAAFVHSLMAASFAHESTVACKKNT----LGDQ
SciWntF     136 -----QGPLFCRA---LQKGSREAAAFVHALMAASLAHEAVVACSRGN----LEDC
LcoWntQ     192 -----SDN--HKSPLFCQH---LIQSHTREAAFLHALMAASAAHEMAQACKACK----VQSC
SciWntQ      50 -----SAE--HANKPLFCGA---VTRLHTREAAFLHALMAASSTHETAQACSQK----LSSC
HdujWntD     90 -----GAYLLGRA---LTKESKESAYARTLISAAITVDIATACRENI----IPNC
HdujWntE     95 -----GAYILGRG---VETIDSRREGAYVRSLSIAAILFDVAVACREGL----LPQC
HdujWntF    115 -----RQLVFCNF---VHTMSVEREAIVSMVSGAVMHDITTCREKK----LVDC
HdujWntH    116 -----RQLVFCNI---VHTMNLREAAVLMMSIASVMMLTTCREAL----LQDC
HdujWntI    108 ---G--SNRGYLFQ---LQKSSIPESGYLRAAVASSIIEYLAADCRGF----IPNC
HdujWntG    110 -----ESFLLQE---VESTANKEREYVRVLLAASITYDVAEQCRKEH--I--PACP
OloWntII    123 -----FCN---AFTAGSRQAAYVRSVLGVAVTYSITIAAGSYGS--L--PLTC
OcaWntIIa   110 -----GSHLFGP---VYNSGTREAAVLRGILNVAVSIVMAGADGS--M--PWTC
OcaWntIIb   117 -----GPYLFGP---VYRAGTRETYLRALIGAAGTYAMVVACADGA--M--PWTC
OcaWntIIc   92 -----GPYLFGP---VYRAGTRETYLRALIGAAGTYAMVVACADGA--M--PWTC
OcaWnt5bX   102 -----GKDVFGP---LVNQDGKESALHAIISAMAAVITRECARGN--I--PLLQ
OcaWnt6X    145 -----GRDVFGP---LVRQGVKRESSAYALVSAMAMYITRECAMEA--I--PRLC
LcoWntK      88 -----LPY---MASRTRETAFTVQALLAATLITSLVRSRCDGS--T--DESC
SciWntK     119 -----LPF---LSRKATRESAYINALMAAALASGISHACHRGTT--A--AVPC
LcoWntU      34 -----NTSRVFGKA---VLKGTRESAFLHSLMATAAVMRSIARSQGGQL--L--GDRC
SciWntU      80 -----NSSKLFQDA---VLAGTTREGAFLHALMTASLIQSIARSQGGKGY--L--ADRC
SciWntM     107 -----STPFLFCGK---LSKGSHRESAFIHALIASVTHGVARACASAGR--L--GRLC
ScoWntX3     92 -----LDTTLFCRG---AVKGTHEPESAFIHALIASVTHGVATACSQK--L--GNLC
LcoWntH     114 -----WNV---FLSKIHKREAAVYHVAIVSASVASQIILDCKKGN--L--PSVP
SciWntH      95 -----WKV---FLGKTHKEAAAFVHAVISTAVSAQLVHDCNNGR--L--PSTT
ScoWntX4    114 -----WNI---FLGKHLKREAAVYHVAIVSASVASQIILVHDCNNGR--L--PSTT
LcoWntB      81 -----FVPLL---MSSATREGAYLKALTSVMVAYEIAWACTSGY--L--QDVC
SciWntB      89 -----LVPMLKD---TTNMPQAAFVKALTSAMVAYEIAQGCYYGY--T--KLNC
SciWntO      22 -----RSM-LRN---ALRQGSPEAGFVAASQAGVAYSLLACKREQ--FA--GGYC
HdujWntK    113 -----APLFLQMQ-PFVHHLTKETAFTQALLSALSFIKVARGTSET----FTSC
HdujWntJ    126 -----APLFPCHIQ-PFVSHLTKETAFTQALLSAMYFRLARG----FRSC
LcoWntP     129 -----WKR---FLSRAHPEAAVFRALLSSNLVFOARHCAIKQ----DALC
SciWntP      99 -----WKK---FLLRHPEAGYFRALASVVFHTARHCAMGK--I----TC
ScoWntX2    106 -----WKK---YLLRAHPEAGYFRALASLVFHTARHCAMGK--I----SC
LcoWntL     176 -----NRYPFQHSPPRRLAGTKEQAFVLSALEAAGSVVKLARKCSDGSH--L--GREC
SciWntL      90 -----SRYPFQVDNPPKLLKGTKERAILSALDSAGVLVKSRECNKGG--P--PLRAC
ScoWntX5    156 -----SRYPFQKNMPPKRLRGTREAILSALDSAGALVKLSRECSRGT--TDSFAC
LcoWntS     100 SSAD--GIPPPYFGR---FTDATRQAAFIHALSIAVLLQEMVRS----EAPC
SciWntS     158 WSSDVPALPPPYFCK---FLDLSRQAAFIHALSIAVLLQEMISK-----EVPK

```

```

*
AquWntC 141 EC GKNTT-----
PfiWntC 161 ESQT TGT-----
HdujWntC 120 SCGR TAT-----
AquWntB 137 SCDT SRQ-----
PfiWntB 82 GCDT RFN-----
EmuWntB 128 GCDT SMS-----
SlaWntB 128 GCDT SMA-----
EfrWntB 128 GCDT SMG-----
AquWntA 137 TCQI NGD-----
EmuWntA 8 KCET VGX-----
SlaWntA 147 QCET VGD-----
EfrWntA 148 ICET IGD-----
CreWntA 154 QCSD AP-----
PsuWntA 144 PCLR GFL-----
CcaWntX1 142 GCDR SNAFRSY-----
HdujWntL 149 SCDQ TVR-----
OloWntI 124 GCGR EDD-----
OcaWntI 132 GCGR VRG-----
CcaWntI 67 GCDR SWI-----
LcoWntA 145 GCDK DWT-----
SciWntA 143 QC DQTLT-----
ScoWnt-i 150 GCDK TLT-----
SciWntN 153 ACNK SQQ-----
ScoWnt-ii 155 GCDK LSM-----
SciWntT 178 GCAT GSE-----
LcoWntE 160 GCDT TWT-----
SciWntE 183 GCDT TWT-----
ScoWnt-iii 152 GCDT TWT-----
LcoWntR 176 GCDQ LWR-----
SciWntR 183 GCDK IWK-----
LcoWntC 142 GCDK SVL-----
SciWntC 139 GCDK SVL-----
ScoWnt-v 139 GCDK SVL-----
LcoWntI 150 SCDT SVK-----
SciWntI 144 SCDT SVH-----
ScoWnt-iv 143 SCDT SVH-----
LcoWntJ 138 GCDD SPYRTG-----LVGNTNGATLL-----AIDPANP-----
SciWntJ 146 GCDD SPQYRAG-----QRGSSSGATSLS-----SANRPAQG-----
LcoWntG 145 GCDL TYR-----NYGEEQRNK FQHRSTR LHGRGE-----TPTDSSDGTLDLEYDVT
SciWntG 142 GCDS SFK-----QYGREQHEK FQQRSSRIRAEAESSSPGGSGEVNLDLDGDII-
ScoWnt-vi 144 GCDS TYR-----NYGKEQRDK FQQRSAKLR SAGESDK-----GDQVMDLDGDII-
OcaWnt2X 197 GCRK ISS-----
EmuWntC 132 GCSQ FNT-----
SlaWntC 27 GCSA FNT-----
EfrWntC 179 GCAT FNS-----
CreWntC 192 SCPE KEG-----
CcaWntX2 220 GCASN RI-----
LcoWntD 161 RCKT NHHEA HLLLGLI-----
SciWntD 157 NCVT NYHEEDQLRGLV-----
ScoWntX1 156 NCVT NYHEDTDLKAIV-----
LcoWntF 181 GCQR PDS-----PTPMLLEKSAEELQY-----ALKAPLL-----
SciWntF 180 GCVR PQL-----PAPTQKDIEQYELTQFGQSGAPVAPRA-----
LcoWntQ 241 TCGH FELVEIH-----MDGKKNVTSAPT-----TTALPATASA-----
SciWntQ 99 GCSMPDQAELSALYPNTSSSSSGPSIHDVITASSQRPSSAVT-----
HdujWntD 134 FCAH DFP-----
HdujWntE 139 FCHAD SP-----
HdujWntF 159 SCNF SLP-----
HdujWntH 160 SCHFP PD-----I-
HdujWntI 154 PCGS VHK-----
HdujWntG 155 SCSIH GG-----
OloWntII 163 GCLSR SK-----
OcaWntIIa 154 GCLAR TK-----
OcaWntIIb 161 GCLSR SK-----
OcaWntIIc 136 GCLSR SK-----
OcaWnt5bX 146 GCART RQ-----ELSKDQW-REIL-----
OcaWnt6X 189 HCAST PK-----SISQDEW-RKTV-----
LcoWntK 128 SCEAEHRRRIA-----MVEAGRDNST-----
SciWntK 159 SCLAVHEDRKA-----EADGERDNST-----
LcoWntU 80 PCGQ YEG-----
SciWntU 126 PCGQ DAG-----
SciWntM 153 TCAV GGL-----SVSRDDP-----
ScoWntX3 138 TCSAG VL-----
LcoWntH 154 ICGSG SL-----
SciWntH 135 ICGT NPS-----
ScoWntX4 154 ICGGS PS-----
LcoWntB 123 GCSQ GQG-----
SciWntB 131 YCPV VAG-----
SciWntO 66 GGNAT TL--SD-----
HdujWntK 159 KCMAG SS-----
HdujWntJ 167 DGER VEN-----
LcoWntP 168 YADNR T AQEMFA-----
SciWntP 137 YMGNT TNSKNPS-----
ScoWntX2 144 YLGNT TEGGHPS-----
LcoWntL 226 SCPG VFG-----
SciWntL 140 QCLG STT-----
ScoWntX5 207 SCIQ SAT-----
LcoWntS 144 GAHQ AS-----
SciWntS 204 GAHCS ILNRE-----

```



\*

AquWntC 148 -----ISSAGNQVY--GCSN---WEFCMEMSA--KFLDGGKEKHGVV-----  
PfiWntC 168 -----ITVNETHSVT--SDLHD---VTYSAILAE--KFLDSIENGGKS-----  
HdujWntC 127 -----LPTGAGQYFA--SCSEN---IGFQOEVS--RFLDEAEHDRG-----  
AquWntB 144 -----GQTSFQGWG--GCSDD---VGFVMLTR--AFLDTRNNATNK-----  
PfiWntB 89 -----GQETQQGWG--GCSDD---VEFCANFAH--MFLDVRETENIE-----  
EmuWntB 135 -----ALTQLGMDWG--GCSHD---VNYGVQYAO--SFLDARETTNQT-----  
SlaWntB 135 -----ALTQSGMDWG--GCSHD---VDYGVQYAO--SFLDARETTNQT-----  
EfrWntB 135 -----TPSQSGMDWG--GCSHD---INYGVOYAO--MFLDAREATNQTA-----  
AquWntA 144 -----NGVVNSTFLY--ECSFD---IAKADHIMS--KFLTPSNDDTA-----  
EmuWntA 15 -----GVRNSGCPGKHHLN--DCSDN---TGYATDTMN--QFLRDNSTN-----  
SlaWntA 154 -----VRTQDAQGNII--N-DCSDN---IQYASNTVL--QFLKDNSTN-----  
EfrWntA 155 -----VRTQDAQGNII--N-DCSDN---IKFASDIVR--QLTRENSTN-----  
CreWntA 161 -----RTVDDENNIIE--TCKAD---FNFSSEYFG--EFLAAQIS-----  
PsuWntA 151 -----VNTTANGDTIIS--DCAAN---FEWANFFS--SFLTSVYEQ-----  
CcaWntX1 153 -----VSSGKNPRWDFD--DWD-DCSDN---IKFQNEFAS--EFLRQPNKG-----  
HdujWntL 156 -----SPPTDGSFLWS--GCSDN---YEYGYYSQ--RFSNSAYQLTDT-----  
OloWntI 131 -----EAGDDMDWG--GCSDN---LDQGRESSA--RFLRDDVKSP-----  
OcaWntI 139 -----EKEGETMEWG--GCSDN---LEYCIDYTT--RFLSNRERV-----  
CcaWntI 74 -----KKTQYGDMDWG--GCSDN---IEYQVEFSR--NFLARTPK-----  
LcoWntA 152 -----SKKPVGYSWG--SCSDN---FVKGELFAR--EFLSARKNE-----  
SciWntA 150 -----KNKAKDMDWG--PCSDN---YHKQKYAK--EFLDAGKNE-----  
ScoWnt-i 157 -----AKESPDMTWG--SCSDN---FHKGEEFAK--QFLDGSRND-----  
SciWntN 160 -----AVGNMTWGW--SCSDN---FQSGDKFAG--EFLSGMVKA-----  
ScoWnt-ii 162 -----EKKPGNMTWGW--SCSDN---FNKGSQYAA--EFLSDVYMANR-----  
SciWntT 185 -----LGNPEGNMTWA--SCSDN---IADGIRFSR--EFLNGREDG-----  
LcoWntE 167 -----KHEAVNMTWGW--SCSDN---FVKCYELGK--QFLDASETDV-----  
SciWntE 190 -----RNEAVNMTWGW--SCSDN---YVKCYELSK--QFLDAGETDT-----  
ScoWnt-iii 159 -----QTEAVNMTWGW--SCSDN---YVKCYELSK--QFLDAGETDA-----  
LcoWntR 183 -----DGGKSGVQTNST--SWG-ACSDN---MHYAYKKT--QFLTSGVHPAR-----  
SciWntR 190 -----QGGGSDIKPNAS--SWG-ACSDN---LHFAHTQTL--NLGAPNEENG-----  
LcoWntC 149 -----DDDSNVGNMDWG--GCSDN---FEKGRQYSR--MFLDIGAKETLPASPPVTPM-----  
SciWntC 146 -----DEETTEEEMEWG--GCSDN---FLKQOYSQ--QFLDLAAKDLPA-----PSE  
ScoWnt-v 146 -----DDDTNAGEEMEWG--GCSDN---FQKQOYSQ--QFLDLAAKETPA-----TVE  
LcoWntI 157 -----DSTIEHNIKGEF--SWG-GCSDN---FAKCYQFAK--EFLDVAHLSQ-----  
SciWntI 151 -----DENIEHNIKGEF--DWG-GCSDN---FAKCYQYSK--EFLDVAHTEEQ-----  
ScoWnt-iv 150 -----NEDVEHNIKGEF--DWG-GCSDN---FAKCYQYSK--EFLDVAHTADQG-----  
LcoWntJ 167 -----RTDKTGGAEVWG--GCSDN---VNTGYSYGR--EFLGDERTFSSK-----  
SciWntJ 177 -----EPTGAADATAGK--VWG-GCSDN---VDTGAYAGR--QFLGQGQVFSPT-----  
LcoWntG 192 -----DPGEVLLQKEDAE--RWG-GCSDN---WEACMRVAA--EFLDSGAI--SDLR-----  
SciWntG 190 -----NSVPLTEDDQSM--VWG-GCSDN---WEACMRVAA--EFLDTGAVLNRSK-----  
ScoWnt-vi 189 -----KAVPLTGKQDSM--SWG-GCSDN---WEACMRVAA--EFLDAGTITNRT-----  
OcaWnt2X 204 -----DDKGVTEWE--GCDD---VKVGSKFSR--DFVVASLRG-----  
EmuWntC 139 -----NNMAQVSGNTYS--G-NCSDN---LDFGYRFAM--NETTSGVTS-----  
SlaWntC 34 -----NTMAQVAGDSYS--G-NCSDN---MEFCYQFAL--NETTSGITS-----  
EfrWntC 186 -----NNMPQGDGNTYS--G-DCSDN---FEFCYQFAL--NETTSGITS-----  
CreWntC 199 -----GCPDP-----VTYGLHIAA--TFINMRYTSSG-----  
CcaWntX2 227 -----PETHSDDNMDWG--SCSDN---VYFCANVSA--MFLNSQEHKR-----  
LcoWntD 177 -----NATEDIALAEHRWK--QCSDN---MAHGLRTAK--KQSVSPAPGVW-----  
SciWntD 173 -----DREQAARWATADY--RWK-NCSDN---IAYGLRMAK--KQSVSEPRPGVW-----  
ScoWntX1 172 -----DSEQEGFYLRSEHRWK--NCSDN---ILYGLRMAK--KQSVSEPRDGIW-----  
LcoWntF 210 -----TKQVLLQKFNRLB--WTGCFDN---TKYGSKAE--EFLVRSASFVK-----  
SciWntF 214 -----GETHLDDKLNIS--VWSAKCFDN---ILYGMSKAD--EFLVQKSSRYVK-----  
LcoWntQ 274 -----AIHPSARTSMKVKQLRA--GCSDN---IEYQVENTV--DFQLRSEHAQAQVSG-----  
SciWntQ 141 -----SAMVTERSLAKHKRVRP--RCSDN---IEYQVRASR--EFLHRTIEVEQSD-----  
HdujWntD 141 -----FVTTEGDIVKEG--GCSDN---YGYAIEVNI--AFTGGEEBAHKN-----  
HdujWntE 146 -----YIRKLSDGTILLN--GCSDN---PDYAKRTAD--VFLDSPGPLPLQ-----  
HdujWntF 166 -----GIIQSFVEGKLVAV--G-GCSDN---LATPKARTM--TFLKMDPRSTSS-----  
HdujWntH 168 -----LRFERIVVNGNATYIYA--GCSDR---LDIPAERTK--QLLDVNSNVED-----  
HdujWntI 161 -----FIELLPNGTRIIG--GCSDN---IHHAATVAE--PFLGALGA-----  
HdujWntG 162 -----LPFVEPISSGVKLR--TCSVN---LQWAQVAR--LFLMGQDSAD-----  
OloWntII 170 -----LPPFNRTYEMWG--ECSHD---VSRATLAS--NFLIAGEEGEDE-----  
OcaWntIIa 161 -----LPQFDNATYEMWG--ECSHD---VNLGNLGS--AFTSAGEVKEEQ-----  
OcaWntIIb 168 -----LPPFDNYTHEWG--ECSHD---VRRGIDLAC--SFLRAGEVETEQ-----  
OcaWntIIc 143 -----LPPFDNYTHEWG--ECSHD---VRRGIDLAC--SFLRAGEVETEQ-----  
OcaWnt5bX 164 -----PNDFQRHNDPDES--SWG-GCTED---VDFGYKTKK--EFLDSSYDAWLSTVPPP-----  
OcaWnt6X 207 -----PAILSRDENSASF--SWG-GCTEN---LDFGYKVS--RFLDLSHKDC-----  
LcoWntK 149 -----LLESMWENNELEDMLKT--ECSDN---IKYATRF--DFTNQAEDA-----  
SciWntK 180 -----VAAMQDDARVQRMLNG--KCNND---IAHARKFSQ--DFLDRQVDT-----  
LcoWntU 87 -----STIPGNRDHWG--NCSVN---LVYQKMVR--KISNPNARRQN-----  
SciWntU 133 -----ASFHNGQAQNMWEG--NCSVN---MVYGRNLVR--RLANPPNARRQN-----  
SciWntM 167 -----SGTQGRSSAAFDMAS--RCGDD---TDYGVRIAK--ALASKPRES-----  
ScoWntX3 145 -----NRKNNTFPVDMQWS--QCSDN---TAYGIRIAK--ALASRSRTA-----  
LcoWntH 161 -----CNSQ-GCAVEV---ISYGYNTARILDWLSHSPAQLPHM-----  
SciWntH 142 -----CQGS-SCTKEI---ITYGYNTARILDWLSNSPDQLQSM-----  
ScoWntX4 161 -----CQGS-SCTKEI---ISYGYNTARILDWLSHSPQLQDSM-----  
LcoWntB 130 -----TYVNFSGRVCRNI---ETTHRVTK--RLDDNTDAIILQ-----P  
SciWntB 138 -----KSEKGVNNAF-ECAQV---MGSQVSGAK--LYLDDTHIAELLQPF-----  
SciWntO 75 -----RARGAAGSAAARWG--Q-----LQHTLQTLRVYMLDDEAENDLA-----  
HdujWntK 166 -----LGHILNRNEKMD-LCMDN---TVAANQATQ--RFLDEMWDTRF-----  
HdujWntJ 174 -----TAENLRNV-HCQEA---QSSSV-----DLGDMWSTN-----  
LcoWntP 180 -----GLVRRPVFSDVEKGES--FCVYH---FKRGLQVAVLDIWDKLSDFSIN-----  
SciWntP 149 -----HLEYKLFSDFAKQT--FCDYH---FTEGLRAAKILDVLDGFFFHAMS-----  
ScoWntX2 156 -----QIEYTMFFNDFAKKQS--FCDYH---FTEGLRAAKILDVLDKYYFAMMN-----  
LcoWntL 233 -----RQERFMS-MCDRSRPGPQTIYGVAA--SFLADAHEEICH-----  
SciWntL 147 -----SAGTTQEEFVRHTV--ECSRN---EDASSGPMIAIAK--NFLVDANEHEICK-----  
ScoWntX5 214 -----NRQDSFAQAAE-LCAYS-EKTMFGPMFIAK--NFLVDHNEEICH-----  
LcoWntS 150 -----RCMPDN---FECCALVS--RFLVGGELKGRKI-----  
SciWntS 214 -----PCEMT-RCITON---FKCQDLVE--IFVLSAGDRKGRKM-----

AquWntC 184 -----IGDRQ---LNLQNNQVGRVWFL-----DVN--HKKE  
 PfiWntC 204 -----LSDRQ---HLNLHNNRNLGRMVVQ-----N----SVK  
 HdujWntC 163 -----LGLRQ---LSRLQDLAVGRAVIA-----QLA--AAMG  
 AquWntB 181 -----TGNELEAS---LVNLHNNNAVGRVVS-----D----NMQ  
 PfiWntB 126 -----EKSHGDLGLS---LVNLHNNNAAGRKEVQ-----D----EMD  
 EmuWntB 172 -----DIGTAPVEVNLHNNNAVGRQTVQ-----D----YMQ  
 SlaWntB 172 -----DIGTA---LVNLHNNNAVGRQTVQ-----N----YMQ  
 EfrWntB 172 -----GIGTA---LVNLHNNNAVGRQTVQ-----D----YMQ  
 AquWntA 181 -----IIEAEHNNVGSNLVVG-----QRY  
 EmuWntA 52 -----TSDLD---LVNTHNYQVGLKMTS-----QRN  
 SlaWntA 190 -----ISDVD---VVNYHNYQVGLQVLS-----QRN  
 EfrWntA 191 -----ITDVD---LVNHNHNYEVGLRLIA-----NRN  
 CreWntA 195 -----DSFEG---RLDQHNIIDLKKEATN-----HET  
 PsuWntA 187 -----DLVGV---KSDLHNVNAGILSVK-----KIR  
 CcaWntX1 192 -----QLARE---LNMKNHNEQAGLEVIS-----S----AAN  
 HdujWntL 194 -----GGEGGQEISDYE---LMAQHNAEVGRLVVK-----S----NLQ  
 OloWntI 164 -----SPERR---LMDDHNIKAGIEHAV-----R----ETK  
 OcaWntI 173 -----DKARA---LMDHNIAGTQIAL-----N----TVK  
 CcaWntI 110 -----DLARE---NMDKHNVIAAGKLTQ-----D----SAV  
 LcoWntA 185 -----SSPQS---VVTDHNYQTGREVVR-----Q----SMQ  
 SciWntA 183 -----SSPIS---MVASFNHETGQTVVR-----Q----SMQ  
 ScoWnt-i 190 -----SSPVS---LVENYNHQTGRLVVG-----Q----SLQ  
 SciWntN 192 -----NDSTS---TLAGLNHRFGRKVVG-----K----SMQ  
 ScoWnt-ii 197 -----SSPLS---AVTRHNYDIGRKTIVG-----K----SMQ  
 SciWntT 219 -----RSPSS---LMSLHDTEAGRKLTVR-----S----SML  
 LcoWntE 201 -----SSPQS---KMTLWNYEAGRLLAVR-----R----LMR  
 SciWntE 224 -----STPKS---KSTLWNNNEAGRLLAVR-----R----LMR  
 ScoWnt-iii 193 -----TTPKA---LTLWNNNEAGRLLAVR-----R----LMR  
 LcoWntR 224 -----KTERE---LMAVHDYKLGLEIAK-----E----KMQ  
 SciWntR 232 -----RAHQO---MMEERHNYRMGLEIAK-----D----RMQ  
 LcoWntC 197 STASARRPPADTSPRSRLSE---LTHKWNRSRQGRLLTVA-----D----TLV  
 SciWntC 187 TTTET---VAGTPQSSVVE---EYHKWNNRRGRLLAVA-----D----NLA  
 ScoWnt-v 187 PTATA---AAPSTREPQLSE---EYHKWNNRRGRMAVK-----N----SLA  
 LcoWntI 197 -----VNQTRRD---LLELHNNNEAGRIVVR-----S----TLQ  
 SciWntI 192 -----GNQTALD---VVELHNNNEAGRIVVE-----S----TLQ  
 ScoWnt-iv 191 -----LNQTKFD---VLELHNNNEAGRIVVR-----S----TLQ  
 LcoWntJ 205 -----SSLPSGEISSQ---LMAQONHEAGRQAVK-----S----TVR  
 SciWntJ 219 -----TSQPN-EVASQ---LMAQONHEAGRQAVR-----A----SIR  
 LcoWntG 235 -KEKL---GGMYGKSLLVN---RVALHNNKAGRLLAVR-----R----LLD  
 SciWntG 232 -VDKH---GGMFGKSPVLN---RVALHNNKAGRLLAVK-----R----LLD  
 ScoWnt-vi 230 -TDY---GGMFGKSPVVN---RVALHNNKAGRLLAVK-----R----LLD  
 OcaWnt2X 236 -----ESLRN---LITEHNSNVGRRTVK-----R----LMN  
 EmuWntC 175 -----TTVQA---KTDLHNFKAGINAVK-----DVM--AATP  
 SlaWntC 70 -----ANVQA---KTDLHNFNAGINAMR-----DVM--AATP  
 EfrWntC 222 -----TTVQA---KTDLHNFNAGINAVR-----DIMVPTVTP  
 CreWntC 224 -----GGLKQ---EIVTRNFRATEITIQ-----SVM--SSTF  
 CcaWntX2 263 -----RDLRT---QVNLHNNKAGRLLTVI-----S----ERR  
 LcoWntD 217 -----DRKRQ---LINAHNEKLGROITK-----M-G--FDER  
 SciWntD 216 -----SRQRK---LNLHNEKLGRTIVR-----K-G--FERA  
 ScoWntX1 215 -----SEERK---LMDHNEKLGRLITK-----A-G--FHRA  
 LcoWntF 252 -----RRARQ---LMLHNNHRAAGLKAVE-----KTR  
 SciWntF 257 -----RRARQ---LMLHNNHQAGILITK-----ETK  
 LcoWntQ 321 EISSD---SPTCASHKRRS---LMDAHNEEAGRQITL-----R----HMK  
 SciWntQ 184 ---SS---SPRCTARFSRT---LMDRHNEEAGRQITK-----R----NTK  
 HdujWntD 179 -----VELSA---FVNSHNNELGRKVVV-----E----ESY  
 HdujWntE 185 -----DGLAV---KTLDHNNRLVSEQVID-----SPH  
 HdujWntF 209 -----SSEKENCT---SADVHNAHVGVQMAS-----QTK  
 HdujWntH 210 -----EPCD---LADRHNVEAGIKMAS-----VTT  
 HdujWntI 197 -----MATRE---AVDHHNTELKLGKLS-----STE  
 HdujWntG 199 -----GTARHNDYGIWVN-----K----SLS  
 OloWntII 208 -----ETSADRLNS---LANVHNYEAGTKIAT-----T----AVK  
 OcaWntIIa 199 -----TKLNY---LSNLHNNRDVQKVAR-----E----GAK  
 OcaWntIIb 206 -----TRLNY---LSNLHNNHDVGTKVAR-----D----GVR  
 OcaWntIIc 181 -----TRLNY---LSNLHNNHDVGTKVRKSRGSLFGRTPWIQS-----ATA  
 OcaWnt5bX 211 EMPFSWPKAIEPAPAYTPSQ---LTDLHNEEAGRLLVVT-----K----SRK  
 OcaWnt6X 247 -----SICNR---SVHLRNEEVGRAIVK-----E----GLK  
 LcoWntK 188 -----SRKSG---AFALYNYNVGREVFN-----S----LVE  
 SciWntK 219 -----SKKNG---VFALYNYKVGREVFN-----S----RVK  
 LcoWntU 125 -----QLSPRS---LLOVLNNAAGELALE-----S----VQR  
 SciWntU 173 -----QLRPRP---LLOVLNNAAGELALE-----S----VQR  
 SciWntM 206 -----SSRRK---RLHHHNYVAGYQVPV-----E----MEQ  
 ScoWntX3 182 -----TSRKR---KVLHNNYAAGYHVT-----G----QEY  
 LcoWntH 194 -----KRRQA---LVHNNRDVGRFIVK-----K----HIK  
 SciWntH 175 -----KWRQA---LHNNHNRDVGRLVVK-----K----QMK  
 ScoWntX4 194 -----KWRQA---LVHNNNRDAGRFLVVK-----K----QIR  
 LcoWntB 166 WIANQ---PSFRAKYRKHR---GVKLHNNNRVGRKLFV-----R----EAV  
 SciWntB 177 -NKIY---PSGGAIHSTQE---QVRFHNNNRKGRVFK-----R----MAR  
 SciWntO 113 -----KARRLNSDIQLQVVL-----N----MMS  
 HdujWntK 203 -----PDEER---LVQHNNLEAGRRAVMA-----PE----NYR  
 HdujWntJ 204 -----DDEQR---LVFHNNLEAGRRAVTA-----PE----NVM  
 LcoWntP 224 -----RRRKHTKKFDL---VAHYHNNNAVGRQITN-----SL----RPK  
 SciWntP 193 -----KSKRWRWSRSRDL---HTNYNNNAVGREITK-----DI----RPH  
 ScoWntX2 200 -----KRRWSKRRDL---LTHYHNNNAVGREITK-----DI----RPH  
 LcoWntL 271 -----GSKRVGADPRLC---KVNHNNNVGRITLI-----K----NFV  
 SciWntL 190 -----GSARAGRDETQC---MTNLHNNLVGRRLVV-----R----HMR  
 ScoWntX5 254 -----GTQTHGPDITYC---MTNLHNNMVGRKVVV-----R----SVD  
 LcoWntS 178 -----SDETHRNR---MVNEHNRVAGMAAFR-----TW----GLK  
 SciWntS 247 -----TNETYTNRV---MTHQHNRMAGIKAML-----SR----GLK

\* \* \* \*  
 AquWntC 211 PTCRCVGLSASCSAKTCQRGHE---AFSVAASIK-DKYYKKSCKVSW-----K-  
 PfiWntC 228 YGCRCEGLSASCSIQTCQTLA---NIRTVSAKIY-QAYDNSCKVRT-----N-  
 HdujWntC 190 PQCRCEGLSACSIRTCRTMTP---PLGAGQQLL-SRYGQACRVTL-----E-  
 AquWntB 208 VKCRCHGASGSCATRTCYSOIIP---TVRDISTDML-IKYNHDSVKVTA-----H-  
 PfiWntB 155 VECTCHGISGSCSVRTCWRKLP---ELRSVSKNIK-QKYDQSIKVSU-----Q-  
 EmuWntB 199 TSCSCHGISGSCVQTCWRQLP---EVGAGDVLIR-QKYEAAMVRV-----D-  
 SlaWntB 196 TSCSCHGISGSCVQTCWRQLP---EVGVCDVLIR-QKYNAAMVRV-----G-  
 EfrWntB 196 TSCSCHGISGSCVQTCWRQLP---EVGAGDVALR-QKYDTAVMVKV-----D-  
 AquWntA 199 RKCRCTGFGSGLVQTCYFASP---DIDTIGQRVR-EKYGSSVEVTV-----N-  
 EmuWntA 75 TTCLCHGVSGTCTVQTCYQOVP---DVATIGGTLR-QKYTNAMKVT-----V-  
 SlaWntA 213 STCLCHGVSGTCTVQTCYQOVP---DVSSFDTLR-WKYTNAMKVT-----V-  
 EfrWntA 214 ASCVCHGVSGTCTVQTCYQOVP---DVATIGDILR-WKYTNAMKVT-----V-  
 CreWntA 218 TNCRCHGISGCTVQTCYKRVLP---TVPEIGEQLF-IRYGGAIHVVD-----S-  
 PsuWntA 210 KSCNCHGISGCTVQTCYDQVI---SVSEMRDSL-LSYNGATKVE-----V-  
 CcaWntX1 216 LSCFCHGFGSGLRTCWLEAP---SMNRIGSELK-KAYNKAVKVK-----V-  
 HdujWntL 225 VQCRCEGLSACSIRIACHAAP---NFDLVGQKLY-GSYGNAMKVV-----S-  
 OloWntI 188 RNCRCHGLGCAAIKSCWKEIPR---NFHQLGAVVE-NKFDGSAVKK-----N-  
 OcaWntI 197 KNCRCHGLGCGCSFFTCWKEIPG---KFHNVGEKVK-SKFNAGSILKF-----N-  
 CcaWntI 134 MECQCHGFGSGLTVKSCWKOLP---SMKIGLLVK-REFDGAVKVT-----N-  
 LcoWntA 209 LVCKCHGLGTCAQKTCWYSLP---KVQVVGKTMK-QKYDIPVRVKW-----S-  
 SciWntA 207 LVCKCHGLGTCAQKTCWYSLP---KVQVIGKVKL-NKYTRGLRVRKW-----E-  
 ScoWnt-i 214 LVCKCHGLGTCAHRTCWYSLP---KVQVIGKLL-TKYDAMRVRKW-----E-  
 SciWntN 216 FLCKCHGFGSGLVQTCWYSLP---TIGVVAEQLL-RKYDKIFRVRVW-----N-  
 ScoWnt-ii 221 FLCKCHGVTGSCSYKTCWYGLP---KIQLIGEQLA-KKYDKIFQVVRW-----N-  
 SciWntT 243 RVCKCHGLGTCAHRTCWYSLP---KIHVGTSLK-DKYDKSITKVIP-----R-  
 LcoWntE 225 LQCKCHGLTGSCAHTCWYSLP---LVRVVGSQLL-KKYEDSTIVRI-----D-  
 SciWntE 248 LQCKCHGLGTCAHRTCWYSLP---LVRVGNLLM-AKYESSTAVKM-----S-  
 ScoWnt-iii 217 LQCKCHGLGTCAHRTCWYSLP---LVRVVGKLLM-KKYEASTTVKS-----A-  
 LcoWntR 248 FLCKCHGLTGSCVHTCWYSLP---KIQIIGRALM-RKHAKSVKVK-----N-  
 SciWntR 256 FLCKCHGLTGSCVHTCWYSLP---KIQIIGRALM-RRYGRSLKVP-----D-  
 LcoWntC 236 TRCKCHGLGCACTVVICWKEVP---SVTKIGKVLK-DSYRDAKPVRI-----A-  
 SciWntC 222 TVCKCHGLGCDCTVVICWKEVP---SVQIGEVVK-ESYREAKQVRI-----A-  
 ScoWnt-v 222 RVCKCHGLGCDCTVVICWKEVP---SIKIGKVLK-EAYHDAKLVHI-----A-  
 LcoWntI 223 TICCCHGLTGACNVKICWRSIP---KVQVGLILK-DKYRNAMQVSV-----T-  
 SciWntI 218 TICCCHGLTGACSVKICWRSIP---KVQVGLILK-DKYRNALQVHI-----S-  
 ScoWnt-iv 217 TICCCHGLTGACSVKICWRSIP---KVQVGFILK-EKYRNAMEVAV-----P-  
 LcoWntJ 235 RTCKCTGLTGSCTKKICWRSIP---TIQVIGELLM-ESYRNARQVKI-----K-  
 SciWntJ 248 RTCKCTGLTGACTSKKICWRSIP---TIQVIGELLM-ENYRNARQVKI-----K-  
 LcoWntG 269 IRCRCIHLGSGSCSEKLCWRVLP---SIQRVGERLK-KKFFSAVQVEM-----N-  
 SciWntG 266 IRCRCMGLSGSCSEKVCWRVLP---SIQRVGDRLQ-KKFTAQVAVKVRM-----A-  
 ScoWnt-vi 264 IRCRCMGLSGSCSDKVCWRVLP---SIQRVGERLK-KKFFSAVAVKVRM-----D-  
 OcaWnt2X 260 KQCRCHGASGSCVQSCWNEVP---SMEKVGILLE-KKYRNANVNEV-----V-  
 EmuWntC 202 PKCKCTGLGSGCTIQVCWQEAP---DFSVVGSSIK-KLFDSACVQVSW-----N-  
 SlaWntC 97 PNCKCVGLSGLSCTIQVCWQEAP---DFSVVGSSIK-KLFDSACLVTW-----N-  
 EfrWntC 251 PKCKCTGLGSGCTIQVCWQEAP---DFSVVGSSIK-KLFDSACVQVSW-----N-  
 CreWntC 251 KKCSCHGISGSCVFSVCHSELP---PFSTLAKRVK-QAYNDSCLVLP-----N-  
 CcaWntX2 287 LQCKCHGTSGSCALFTCWMSLP---RFHEVGRHIV-HQYDQAVQVVS-----N-  
 LcoWntD 243 PKCKCTGLGSGCATRTCWREVP---NFRDIGNKIS-ELYTSAKQVOT-----S-  
 SciWntD 242 PVCKCTGLGSGCLTRMCWREVP---NFRVGNALF-SLYRSEVETTL-----N-  
 ScoWntX1 241 PVCTCTGLGSGCATRVCWREVP---NFRQVGNLTF-RLYSRAQRVQI-----S-  
 LcoWntF 275 LQCKCHGLTSSCTVLLCWNEVQ---HFTALGNALK-EKYEQAIRMRIV--IEP-KVPVSA  
 SciWntF 280 MKCCQGLGVTSSCSFVVCWNEVE---HFTKISKQLL-QMYERATPKMVAIVDPEKLPNV  
 LcoWntQ 356 LKCRCMGINSACNIEVCWREVP---SFTKIGNLIM-ERYKNATQLKA-----D-  
 SciWntQ 216 LRRCCHGINSNSCTQVCWKOLP---VFTKIGNLIM-SRYRNASLMKI-----D-  
 HdujWntD 202 TDCRCHGQIGSCTIRICYKRLK---PFTGADALTY-DKYRGAVRVTL-----A-  
 HdujWntE 208 VVCRCHGLTNDCSIKTCVRHLP---PFKQTSSEML-QKYKSAIKVHA-----G-  
 HdujWntF 235 IHCRCHGLTASCNVKTCVHRML---PYTEVASSML-MKYEGAVKVK-----S-  
 HdujWntH 233 RSCCHGLTAACNIQTCVHRML---RYSNVANQML-EKYSGAVKVK-----E-  
 HdujWntI 220 KYCRCHGLSASCSIRVCHQKLS---SFKTHPEILHTKYRQSLVKS-----D-  
 HdujWntG 218 ERCHRRNIFTTFRMLICHYGLD---NVLNPKQPSRIAVAN-----SV  
 OloWntII 237 VVCRCLGGTILSCATRVCHRELP---QFSHIGSTLV-DKYNKAVQIKI-----S-  
 OcaWntIIa 223 LICRCIGGTFSCATRVCHLELP---VFSYFGTKLK-EKYDSAVQVKI-----S-  
 OcaWntIIb 230 VVCRCLGGTIVSCATRVCHLELA---DFAYISDELK-KKYLASAMKVKI-----S-  
 OcaWntIIc 218 RLCKCV-----  
 OcaWnt5bX 250 IHCRCHGACGACNFQTCWEEK---DWEENVGDDIK-KKYDGAVKVKM-----N-  
 OcaWnt6X 271 VNCRCHGPGSSCAVQTCWKEEK---RWEEVSNLIK-EKYDNPVKVTCN-----N-  
 LcoWntK 212 TKCEYGVGSGCDLRTCWRRAP---TPEEVAREIF-KRYLSALRTRK--QF----LHLS  
 SciWntK 243 KKCSYGVSGSSTLHCTCWQEP---SIEEISAELY-HRYGNAIKTRK--HF----LPTK  
 LcoWntU 150 IKCRCHGVSSITCALKTCEMAAP---DLHSTGOTLA-LKYKRSKVKV-----Y-  
 SciWntU 198 ISCRCHGVSSSIMRTCIMVTP---DLSTTQOTLA-KKYRQAKKVV-----A-  
 SciWntM 230 VICSCYGHSGSCTQKFCVHQVQ---RARTVSLRLM-KQYSRATLVQV-----R-  
 ScoWntX3 206 IGCSYGPSSGCTHRCVHRLA---SENALAGKLW-KEYRRAVQVET-----K-  
 LcoWntH 218 ENCKOOGISASCIQWHAHAIP---QPALMIRNLT---RGAFRFLP-----WK-  
 SciWntH 199 KTCDONGISASCLEMRCYHRLP---STRELVSGLM---NNAVFLPW-----K-  
 ScoWntX4 218 KRCKNGVSGSCLNRCYHRLP---EMSEMIRGLM---DNKVFLPW-----K-  
 LcoWntB 201 DVCRCHGLSGCCEIQLCIKQFP---SKRVITQALS-QLYLNARQISF-----D-  
 SciWntB 211 VKCTCHGLSACNLKTCVTPA---RPAALARELR-RMYDNARFVQP-----Q-  
 SciWntO 132 EYCGCRPSFCATCSLTCLGTL---SFSRVSKTIM-SLYYSSVLEET-----N-  
 HdujWntK 229 KECKCHGMTGDCISKTCFKKVK---SPRVLAEFIKRDLYHREKVAALD-----K-  
 HdujWntJ 230 NYCRCHGPTTSCVTRTCQWKLN---YRSHICTYIKETLYPQARKVAVRA-----G-  
 LcoWntP 255 LHCVCTGPSAGCSMTCTCYILOT-KLVKDSGHEIY-NQYRSLRDNPS-----D-  
 SciWntP 226 LRFCYSGPSGTCVLRKTCYVETK-RMTRTADALY-QQYQKRVNGGT-----A-  
 ScoWntX2 231 LHCVCTGPGSGSCLKTCYVETK-RMTRTALALH-EQYQQLLAGGA-----P-  
 LcoWntL 302 RKCSCLGMSCACTVQNCITYMPDILKSRELEYDFK-RAFNAQOQTYV-----K-  
 SciWntL 221 RKCHCVGTGSGCLDQVCKYMPDILHEAPLKREFL-RSFNAQKQVYV-----S-  
 ScoWntX5 285 RRCQCHGVSGSCLHKSICIGYLPDILNDKS-KKDFG-RSFNAQKQAYV-----S-  
 LcoWntS 207 VIKKCFMGSGSACQKKKKTLV---RRAPVSKPLL-ELYDKAAYVKVVL-----D-  
 SciWntS 276 EQQNCFGISGVCSEKHTHTII---RAEQAVQYIR-GLYDRADEIKLVK-----D-

|            |     |                         |                  |                             |              |
|------------|-----|-------------------------|------------------|-----------------------------|--------------|
| AquWntC    | 255 | ---ASA-----             | L                | -----                       | QPHQCNSSSI   |
| PfiWntC    | 272 | ---IINSEDP-----         | -----            | -----                       | SFISTDCDKI   |
| HdujWntC   | 234 | ---PAGPHT-----          | HTL              | -----                       | ALRPACGGSI   |
| AquWntB    | 252 | ---VNRG-T-----          | TVLRST           | -----                       | SSSNTEAVSP   |
| PfiWntB    | 199 | ---VQKD-EP-----         | PSL              | -----                       | KSVGDDPMP    |
| EmuWntB    | 243 | ---IPRDGSP-----         | ASL              | -----                       | YYTDSMQNPVAP |
| SlaWntB    | 240 | ---VPPGGGP-----         | ASL              | -----                       | YYADSGPNPVV  |
| EfrWntB    | 240 | ---VPRDGGP-----         | ASL              | -----                       | YYANSGQNPVAP |
| AquWntA    | 243 | ---ASNS-A-----          | LQPV             | -----                       | VQTINN       |
| EmuWntA    | 119 | ---SGTT-T-----          | LRPVY            | -----                       | SATL         |
| SlaWntA    | 257 | ---PGTT-T-----          | LRPVY            | -----                       | SASL         |
| EfrWntA    | 258 | ---PGMT-T-----          | LKPVY            | -----                       | NQNSAL       |
| CreWntA    | 262 | ---DGEF-----            | -----            | -----                       | ASSNPNDP     |
| PsuWntA    | 254 | ---NGELQR-----          | H                | -----                       | PIPGANPDNI   |
| CcaWntX1   | 260 | ---VTDDGK-----          | KKL              | -----                       | VNKLDFQPL    |
| HdujWntL   | 269 | ---SGTP-----            | VLTPV            | -----                       | DSRTPL       |
| OloWntI    | 233 | ---SGGG-E-----          | L                | -----                       | EVAERNHVP    |
| OcaWntI    | 242 | ---KTTV-S-----          | L                | -----                       | QVDDRGQVP    |
| CcaWntI    | 178 | ---DADR-E-----          | L                | -----                       | IPENPRHIP    |
| LcoWntA    | 253 | ---QPRT-N-----          | IIPY             | -----                       | SALIDN       |
| SciWntA    | 251 | ---AQTE-Q-----          | IKPY             | -----                       | SALVTN       |
| ScoWnt-i   | 258 | ---QPSE-S-----          | LVPY             | -----                       | SALVSN       |
| SciWntN    | 260 | ---STEM-E-----          | VAPFASD          | -----                       | PLKQSLKQSR   |
| ScoWnt-ii  | 265 | ---ATQG-K-----          | VESF             | -----                       | TKDPLKKS     |
| SciWntT    | 287 | ---ADRR-K-----          | LIVL             | -----                       | RATSKR       |
| LcoWntE    | 269 | ---LPRK-E-----          | LIVK             | -----                       | KAIASKKL     |
| SciWntE    | 292 | ---SSGSPR-----          | LIVK             | -----                       | RTTATALPL    |
| ScoWnt-iii | 261 | ---SVSTRQ-----          | LIVK             | -----                       | RISLTRPPI    |
| LcoWntR    | 292 | ---LART-R-----          | L                | -----                       | ERLDMGGK     |
| SciWntR    | 300 | ---SAKQ-K-----          | LVPQ             | -----                       | DTERKV       |
| LcoWntC    | 280 | ---HPQAPL-----          | LIPAG            | -----                       | VSNVNAQL     |
| SciWntC    | 265 | ---HPLSPA-----          | LVPANV           | -----                       | ENNAIAASAPN  |
| ScoWnt-v   | 265 | ---HPLSPA-----          | LAPVGIP          | -----                       | VNSDGVATAED  |
| LcoWntI    | 267 | ---PPSPSDRTTSTTATPARQRL | -----            | -----                       | RPLDRHAGT    |
| SciWntI    | 262 | ---EAPDVDSPPHEEGSREPPRI | -----            | -----                       | VPLDHLAREA   |
| ScoWnt-iv  | 261 | ---ELSDTPGTDIETT---     | RRL              | -----                       | VALDPLVPR    |
| LcoWntJ    | 279 | ---TKKNGP-----          | KLPL             | -----                       | EKDEGKSKV    |
| SciWntJ    | 292 | ---AKKNAL-----          | RLTPL            | -----                       | DRDEGVKTRI   |
| LcoWntG    | 313 | ---PSVPNG-----          | LYSIPS           | -----                       | NPRVTRRKA    |
| SciWntG    | 310 | ---PRSRTG-----          | LAMVMDAA         | -----                       | IGEESRDVK    |
| ScoWnt-vi  | 308 | ---EKSRTG-----          | LLVLPEDG         | -----                       | TGLAAAGR     |
| OcaWnt2X   | 304 | ---KSGSNT-----          | KNL              | -----                       | FKFIPMDSSKK  |
| EmuWntC    | 246 | ---QYLGTNS-----         | -----            | -----                       | NWLSNVCPI    |
| SlaWntC    | 141 | ---QYLGTNS-----         | -----            | -----                       | NWVSSMCPLI   |
| EfrWntC    | 295 | ---QYLGTNS-----         | -----            | -----                       | NWISPACPVV   |
| CreWntC    | 295 | ---GHSR-----            | -----            | -----                       | NDWVAQCDH    |
| CcaWntX2   | 331 | ---QMKHDQ-----          | LTSVSR           | -----                       | YTFSSIRSH    |
| LcoWntD    | 287 | ---TDGT-R-----          | LKVT             | -----                       | QFADKVN      |
| SciWntD    | 286 | ---AAGD-G-----          | LQSVYMATVDAAAGAE | QPTVVVDGGAGDGVTL            | LPA          |
| ScoWntX1   | 285 | ---DDAS-E-----          | LKVAQQ           | -----DIS-VPTVAGA-TATPAIADP  | ---          |
| LcoWntF    | 328 | GE-QHKTEA-----          | TALPLFTSGR       | -----RNLGLRKNVNWYLVP        | AEQDKY       |
| SciWntF    | 336 | TGIPENSTE-----          | AQLAPAVLVKK      | -----LKVS-QKDIRWELRPAQAGAAY | ---          |
| LcoWntQ    | 400 | ---KTGS-R-----          | L                | -----                       | VLANALS      |
| SciWntQ    | 260 | ---RHGT-R-----          | L                | -----                       | VVRHALSR     |
| HdujWntD   | 246 | ---NHPSPMA-----         | -----            | -----                       | GQVVVQGGSL   |
| HdujWntE   | 252 | ---VGEA-----            | PL               | -----                       | SSWQDD       |
| HdujWntF   | 279 | ---PDGL-----            | L                | -----                       | KPLNPNADP    |
| HdujWntH   | 277 | ---AETN-Q-----          | L                | -----                       | LPANALADP    |
| HdujWntI   | 264 | ---FQQT-----            | L                | -----                       | ISTNQDAV     |
| HdujWntG   | 257 | ---FQNGV-Q-----         | L                | -----                       | -----        |
| OloWntII   | 281 | ---KNGE-R-----          | L                | -----                       | KSADSTTGT    |
| OcaWntIIa  | 267 | ---KNGE-R-----          | L                | -----                       | KNSDSATKPF   |
| OcaWntIIb  | 274 | ---KNGE-R-----          | L                | -----                       | KNEDSTAKAF   |
| OcaWntIIc  | 224 | -----                   | V                | -----                       | -----        |
| OcaWnt5bX  | 294 | ---HKNT-K-----          | L                | -----                       | INSDAKVKKH   |
| OcaWnt6X   | 316 | -----                   | LAPVPAN          | -----                       | -----        |
| LcoWntK    | 261 | ---RARN-----            | RS               | -----                       | THRQLSLT     |
| SciWntK    | 292 | ---RRQS-----            | KTL              | -----                       | TFRQKIRSE    |
| LcoWntU    | 194 | ---RGSVDR-----          | RPLHL            | -----                       | ARAVKQGR     |
| SciWntU    | 242 | ---RGSPDR-----          | RPLLQL           | -----                       | ARAVKQHAR    |
| SciWntM    | 274 | ---RRSSGG-----          | WRI              | -----                       | KEVDGK       |
| ScoWntX3   | 250 | ---PRPNGG-----          | WRI              | -----                       | KQVGA        |
| LcoWntH    | 260 | ---NNRD-VV-----         | HSAL             | -----                       | KFRRED       |
| SciWntH    | 240 | ---EHRN-QV-----         | HHSL             | -----                       | KTVRRRS      |
| ScoWntX4   | 259 | ---ENRN-RV-----         | QGSL             | -----                       | KSVRGKR      |
| LcoWntB    | 245 | ---TAIN-----            | L                | -----                       | ENSNV        |
| SciWntB    | 255 | ---QARN-----            | L                | -----                       | RHVR         |
| SciWntO    | 176 | ---SSTD-----            | -----            | -----                       | GTSQENT      |
| HdujWntK   | 276 | ---LHGA-E-----          | L                | -----                       | FTVKPIPTK    |
| HdujWntJ   | 278 | ---GHGSLR-----          | L                | -----                       | IDAETQTRS    |
| LcoWntP    | 300 | ---AVGAAR-----          | RHF              | -----                       | KRIPESIDHDRE |
| SciWntP    | 272 | ---AVESAR-----          | ALIAEA           | -----                       | QAQPRPATVATH |
| ScoWntX2   | 277 | ---AIASAR-----          | KLVKS            | -----                       | IQRGSRTRGQ   |
| LcoWntL    | 349 | ---SHISYVGK-----        | KKELKNKRV        | -----                       | LWRSGDNMEV   |
| SciWntL    | 268 | ---KGQSGK-----          | LRL              | -----                       | SKATDHKK     |
| ScoWntX5   | 332 | ---TSHSGV-----          | KKL              | -----                       | VSSATHIPL    |
| LcoWntS    | 252 | ---PYSLRP-----          | VIYKWERP         | -----                       | AVAMQIEPVD   |
| SciWntS    | 321 | ---YLNTP-----           | QIVKKAQIS        | -----                       | HHRIPIHDDDK  |

```

*
*
AquWntC 269 -----SNTTLVHTLSS--PDYCHKDIS-----KGSFGVQGRLCDPA-----
PfiWntC 289 -----TNNTLIFDENS--VDYCYRDIS-----VGSFGVKQSC-----
HdujWntC 253 -----ATDTLIYSDSS--PNYCLPDLT-----RGSYGTGRRCRRR-A-----
AquWntB 273 -----PVDSLVHVKNK--VKYCIKQND-----Y----TANRSCI PQ-NILTQIESNEA
PfiWntB 218 -----STSHLVFLKKS--KNMCLYKQN-----Y----TLGRSCVFPK-NILTEYHSSGI
EmuWntB 265 -----SSTEMVYLEPT--VDYCSQSNY-----TLNRYCIPR-SNMTS-----
SlaWntB 262 -----MSEITVYLEPT--VDYCSLQSNY-----TLNRYCVPR-SNMTS-----
EfrWntB 262 -----SRTEIVYLEPT--IDYCSTQSNY-----TLNRYCIPR-SNLTS-----
AquWntA 258 -----HDNELVYLKRS--PTFCNQDTT-----YGILGTVGRQCSNN-L-----
EmuWntA 133 -----NESDLAYLADS--PTFCTADNN-----MGILGTSGRQCNP-T-S-----
SlaWntA 271 -----NQSPLAYIAGS--PDECTANN-----MGILGTSGRKCNP-T-S-----
EfrWntA 274 -----NESDLAYIADT--PDLICVANN-----MGILGTSGRKCNP-T-S-----
CreWntA 276 -----DDNTLIFKDNS--PNECVENRQ-----LGTVGVANRRCNPN-S-----
PsuWntA 271 -----NENNLVFLDNT--PDLCKTDLA-----KILGTAHRLCKEE-----
CcaWntX1 278 -----NTPBLAYLSNS--QDECTADKM-----TLQPGTIGRECNVISIS
HdujWntL 284 -----GQTDLVYLDFP--PSYCDRDDR-----YCSLGTQGRYCKVD-S-----
OloWntI 249 -----SNFDLVYLEST--DYSRECVKDS-----VGSHTGTRGLCDPE-S-----
OcaWntI 258 -----TVTDLIFLET--DPTQECISKVVG-----IGSHGTSGRLCDPD-S-----
CcaWntI 194 -----TDSNLVYLTKS--SDYCKYDPS-----TGSHTGTRGCNK-T-S-----
LcoWntA 268 -----ITTELVSYSKGS--PDYCVNNEE-----TCSLGTSGRECDPL-K-----
SciWntA 266 -----VTDQLLYSTPS--LDYCEANDG-----TCALGTAGRQCDFN-K-----
ScoWnt-i 273 -----LTAQLVFDTPS--VDYCEANAD-----IGAPGTQGRVCPNPR-L-----
SciWntN 282 -----MTEKLVYQPS--PDYCEPNKA-----IGSLGTGGRCEPR-I-----
ScoWnt-ii 283 -----MNEKLVFKDTS--VDYQCPNMA-----IGSLGTGGRCEVFPK-V-----
SciWntT 303 -----KDDDLIHLQDS--PDYCTSNST-----VCSLGTGGRKCSFK-E-----
LcoWntE 287 -----SQEDMVHLRRS--PDYCFSDGS-----AGSLGTQGRICDGT-K-----
SciWntE 311 -----TTEDLVYLRRS--PDYCLSDPA-----AGSLGTGGRICKGK-K-----
ScoWnt-iii 280 -----THEDLVHLRRS--PNYCVSDPE-----VCSLGTGGRICKGK-K-----
LcoWntR 308 -----QVKAVVHLHDS--PSYCVRDES-----IGSLGTGGRKCGTR-S-----
SciWntR 315 -----DIKPSLHLHQS--PSYCDRDPV-----VCSLGTAGRECGQR-R-----
LcoWntC 302 ---ATLATKNLVYMKES--PDECMANTT-----LGIPTGTARRQCIKD-S-----
SciWntC 288 ---PILTTNALVYVKES--PDECVANGT-----IGVAGTARRRCKEN-S-----
ScoWnt-v 289 -----ITSALVYVKES--PDECVANAS-----IGVSGTARRRCKNK-S-----
LcoWntI 297 -----KSSLLVYLAPS--PDYCKPNAS-----IGVNGTAERECRAE-S-----
SciWntI 292 -----EPALTYLHTS--PDYCRPNAT-----IGIKGTGERECNLE-S-----
ScoWnt-iv 287 -----DESELTYLHSS--PDYCKPNAT-----IGINGTARRRCKVE-S-----
LcoWntJ 300 -----KSELTYLTPS--PNECRRNMT-----SGVEGTGRGRCDEL-S-----
SciWntJ 313 -----VATELSYVRQS--PDYCRPNAT-----SISGTRGRQCQL-S-----
LcoWntG 335 -----PSKDLVYAEAS--PSECELSQL-----RASPGTGGRCKPWS-----
SciWntG 334 -----PSKDLVYSETS--PSECIHDQL-----KASPGTGGRCKPWS-----
ScoWnt-vi 332 -----PSKDLVYSETS--PSECNANQL-----KASPGTGGRCKPWS-----
OcaWnt2X 325 -----REDQLVYQSDS--PSYCNDRR-----AFSLGTSGRECNST-A-----
EmuWntC 263 -----TDRTLVYGGQS--PNWCYADPS-----VGSMTGVTGRQCDFN-S-----
SlaWntC 158 -----TDRVLVYGSQS--PNWCIPDPT-----VGSMTGVTGRQCDFN-S-----
EfrWntC 312 -----TDKTLVYGGQS--PNWCYDPT-----VCSLGVVGRQCDFN-S-----
CreWntC 310 -----TDSLLF--TKS--NTWCYDPE-----IGSAGVVGRECDPH-P-----
CcaWntX2 353 -----DSLVLVYEKES--PRYCVRNKL-----VCSLGTGGRCKEQN-S-----
LcoWntD 307 -----APTDLVYSAAS--YSECDIIPP-----LDVFGRTGRVCKQN-S-----
SciWntD 325 -----SENQLVHGSDE--WSYCDANSE-----FDIAGTGRICQTG-S-----
ScoWntX1 316 -----SEFELVQADT--LSECDANPS-----LDIAGTGRICQES-G-----
LcoWntF 371 -----TEDDLVYLDSS--ADYCVENQE-----MGIPGTGRQCHDA-E-----
SciWntF 378 -----SAHELVIYDQS--PDYCKRNDP-----LGVQGTGGRQCHRD-D-----
LcoWntQ 416 -----SKEDLVYIDAS--PAFCREQRS-----LDVLGTSGRECRNT-A-----
SciWntQ 276 -----SSTDVLYLGS--PSECSDFPG-----LDIVGTSGRECRVS-Q-----
HdujWntD 263 -----QRDMVYSDQS--PSYCESNQE-----NMLGTHGRQCDS-H-----
HdujWntE 266 -----TPNDLVYTQDS--PNYCKANPA-----NMLGTSERVCHFD-E-----
HdujWntF 294 -----TDMOLVYFTDS--PDLCAINAT-----MDVPGTKDRKCDPN-T-----
HdujWntH 293 -----TSGDLVYFCD--PDYSVANAS-----MDIPGTKDRKCDPS-K-----
HdujWntI 278 -----TAETVAHLDP--VNSCHMH-----STVCKQCSI-----
HdujWntG 264 ---WNGNLDRTYLTPS--VDYCCDNRLSWGSPPTIPWTRGRCVPRDS-----HLA
OloWntII 297 -----EDTDLVY--ANS--ASLCEPNSA-----FGYDGIHGRECISDDP-----
OcaWntIIa 283 -----DDGDFVYGTDG--GSLCEPNPA-----FGYEGVHGRECSKD-R-----
OcaWntIIb 290 -----DKSFLVYGTDG--GSPCLVNP-----FGYEGVHGRNCSKD-R-----
OcaWntIIc 225 -----R-----
OcaWnt5bX 310 -----IHSFLVFLQDS--PNLCTENGE-----LGEVGTGGRKNGT-S-----
OcaWnt6X 323 -----KIPNLVCQNES--PDLICVNDK-----VGEVGTGNRKCST-S-----
LcoWntK 277 -----KRDQLVEMKHS--PDECTSQPT-----LGFPGTYGRRCETFT-----
SciWntK 308 -----RPGQLAYLRSS--PDYCTADAS-----RGIPGTGRRCERTFS-----
LcoWntU 216 ---NLTEYMLHYTDP--PDECTKDV-----GGIPGNTGRPCSSH-K-----
SciWntU 267 HVGLNISLYQLHYTNS--PDECTPDV-----RGIPGTGRGVCSTK-V-----
SciWntM 291 -----SKNSLVYSTPS--PDYQCPDVA-----LGYPGTKDRECTND-S-----
ScoWntX3 267 -----SKETFVYSTLS--PNYCEQNVH-----LGYPGTGRKCLDD-E-----
LcoWntH 279 -----GKTTLVYMKKS--PSYCCADNS-----QGITGTGRTCFGK-----
SciWntH 258 -----GKTTLVYMKRS--PSYCCDRS-----QGILGTGGRSCNSH-----
ScoWntX4 276 -----GKTFLVYMKRS--PSYCCSDPS-----QGILGTGGRSCNGQ-----
LcoWntB 255 -----SNKALVYIHDS--PNECKRRPF-----YGHFGVTGRRCNPS-G-----HLA
SciWntB 265 -----APTQLVYTAHP--PSMCQPLPD-----LGFPGIQNRQCTMPFS-----
SciWntO 187 -----TNISLVHL--QT--PDYQESHA-----LGSPTGRRCRCEMR-TIAQEV-----V
HdujWntK 292 -----SHTSLVFTEDS--PNYCVSNIE-----YGALNVSGRECVES-Q-----
HdujWntJ 295 -----PHDMLVYTEE--PDYCESASV-----FGAVDSNRRRCLP-G-----
LcoWntP 321 -----KPPVLAAPRAS--PNYCTSSKR-----HGILGQHRRCVAF-QCGTK-----
SciWntP 296 -----RNMSVYATRHS--PNYCRRNSN-----WLLGPRGRSREACG-----
ScoWntX2 298 -----RNITVYASRPS--PSYCRPSK-----WGILGPNRRCYTAG-----
LcoWntL 377 -----TDTQLTYRPS--PKLCHFHR-----HIAPPVGERNCSLA-P-----
SciWntL 286 -----GNTLVYFRPS--PRLCSHFR-----PIGPPVHRYCKNITG-----
ScoWntX5 350 -----RSDQLAFQSS--PILCSHNR-----PIGPPVGERYCNAT-A-----
LcoWntS 280 -----QPTMIVYLLKKS--PSECHGK-----YGLAKPSGRPEEE-G-----
SciWntS 348 -----RKEQLIYARKS--PNECRRR-----YGLPGPSGRQCDDID-G-----

```

AquWntC 303 -----V<sup>\*</sup>SKS<sup>\*</sup>CET<sup>\*</sup>IC--CGRGHIEFTKDVE-GRC-C<sup>\*</sup>KQV-----GC--CGV<sup>\*</sup>

PfiWntC

HdujWntC 288 -----PPTHPESSSLC--CGRGQLVQTTAA-YHGC-RFE-----NFQI

AquWntB 314 NP-THYPGYPLPACESLC--CSGEMTEEYTVS-TTCYC-HFV-----WC--CKI

PfiWntB 259 EP-LTSVDLTLAPCEDLC--CAGEYSLKRTVVV-RSCNC-HFV-----WC--CDI

EmuWntB 300 -----YLGYYSTCEDLC--CNGQVTVKTI RT-YSCNC-KFI-----WC--CNV

SlaWntB 297 -----YLSGYYSACEDLC--CNGKYITLQRTRT-YSCNC-KFI-----WC--CNV

EfrWntB 297 -----YLTGYAAACEDLC--CNGRVTVTRT RT-YSCGC-KFI-----WC--CNV

AquWntA 293 -----SDPDS<sup>\*</sup>CDI<sup>\*</sup>IC--CGRGHITVTATQP-KQC-C-SFI-----YC--CRI

EmuWntA 168 -----LGLDSCFYLC--CNRGYTAKTRIVP-EEC-C-QFV-----WC--CRI

SlaWntA 306 -----QLDSCYFLC--CGRGYTAKTTIVP-QQC-C-QFV-----WC--CRI

EfrWntA 309 -----QLDSCYFLC--CGRGYTAKTTVVP-QEC-C-QFV-----WC--CRI

CreWntA 311 -----NSRNACASTC--CDRGHHTITKHVPIEEC--KFI-----WC--CRI

PsuWntA 305 -----PCLLD<sup>\*</sup>CANLC--CGRGYTVTYTVPIEEC--RFV-----WC--CRI

CcaWntX1 314 -----SEEGSCSYLC--CGRGHMTLILDD-REC-C-RFH-----WC--CEV

HdujWntL 319 -----VGVDSGHL<sup>\*</sup>C--CGRGRVEYLEVP-ELCNC-RLT-----DCPNSCRF

OloWntI 286 -----SCTEGCAHL<sup>\*</sup>C--CGRGYDTFEETDI-EKCNC-KFV-----WC--CRI

OcaWntI 295 -----SCIDRCDHL<sup>\*</sup>C--CGRGYTTREEVDR-FDCNC-RFV-----WC--CSI

CcaWntI 229 -----DCIDGCSLMC--CNRGYYSREVTLT-RRCKC-QFI-----WC--CHV

LcoWntA 303 -----TCPGGCQKLC--CNRGHNERRHVET-RKCKC-QFI-----WC--CHV

SciWntA 301 -----TCPGSCNHL<sup>\*</sup>C--CARGYNERRRIEE-RKCNC-KFL-----WC--CRV

ScoWnt-i 308 -----SCVGGCTRLC--CGRGHNERRRIET-KKCKC-KFV-----WC--CRV

SciWntN 317 -----ACPTSCDTVC--CGRGNERRRIAS-QRCRC-RFH-----WC--CRV

ScoWnt-ii 318 -----DCTSSCDEV<sup>\*</sup>C--CGRGNERRRIES-KTCAC-KFL-----WC--CKV

SciWntT 338 -----GAENHCDKMC--CGRGNVRRRINN-EKCS-C-RFE-----WC--CRV

LcoWntE 322 -----SSSQGS<sup>\*</sup>CDHL<sup>\*</sup>C--CGRGNVQRYTEE-EQCRC-KFV-----WC--CHV

SciWntE 346 -----SCYGGCDHL<sup>\*</sup>C--CNRGNVQRYAEK-EKCKC-KFV-----WC--CHV

ScoWnt-iii 315 -----SCYGGCDHL<sup>\*</sup>C--CNRGNVQRYTRK-EQCRC-AFV-----WC--CHV

LcoWntR 343 -----TLMGNCDRLC--CGRGQTRRFIFQ-EKDCD-HFE-----WC--CRV

SciWntR 350 -----VKQSI<sup>\*</sup>CP<sup>\*</sup>TL<sup>\*</sup>C--CDRGSMPRAVLH-KQCNC-RFE-----WC--CRV

LcoWntC 340 -----KCEDGCELL<sup>\*</sup>C--CGQGYEYRIVKR-EQCRC-KFV-----WC--CDV

SciWntC 326 -----KESDGC<sup>\*</sup>ELL<sup>\*</sup>C--CGNGYFETRAVKR-EQCEC-KFV-----WC--CEV

ScoWnt-v 324 -----QESDGC<sup>\*</sup>ELL<sup>\*</sup>C--CGNGYFETRDVKR-EQCAC-KFV-----WC--CEV

LcoWntI 332 -----REDDGCELL<sup>\*</sup>C--CGNGYVVKRSVLR-QKRC-C-KFI-----FC--CEV

SciWntI 327 -----REDDGCELL<sup>\*</sup>C--CGNGHHPQRSVLR-QQCKC-KFV-----FC--CKV

ScoWnt-iv 322 -----REDDGCELL<sup>\*</sup>C--CGNGYVVKRSVLR-QKRC-C-KFI-----FC--CDV

LcoWntJ 335 -----HEDDGCELL<sup>\*</sup>C--CGRGYAKRTVKL-QKRC-C-RFL-----WC--CKV

SciWntJ 348 -----TEDDGCELL<sup>\*</sup>C--CGRGYAKRTVTT-KKCKC-RFH-----WC--CRV

LcoWntG 370 -----ADEDSQSLC--CGRGRTIEETLQ-ERCRC-KFH-----WC--CRV

SciWntG 369 -----PEDDSQHL<sup>\*</sup>C--CGRGYTTERKRV-ERCRC-RFH-----WC--CRV

ScoWnt-vi 367 -----KCEDNCEQL<sup>\*</sup>C--CGRGYTTEEKRV-ERCRC-TFH-----WC--CRV

OcaWnt2X 360 -----NDHASTSN<sup>\*</sup>FNLC--CGRGYDVITEIRQ-KNCRC-HFN-----SC--CAV

EmuWntC 298 -----SESNRCS<sup>\*</sup>SLC--CDRGYVETQVTD-TDCNC-KFV-----YC--CSI

SlaWntC 193 -----SCPNSQSS<sup>\*</sup>SLC--CNHGYVQTQIAQD-TDCNC-KFV-----YC--CSI

EfrWntC 347 -----SCTNKCS<sup>\*</sup>SLC--CDHGYVQTQTQON-SDCNC-KFV-----YC--CSI

CreWntC 344 -----EAPNSCNKLG<sup>\*</sup>GGCKRPSIQQTVEEV-VQDCD-QFI-----FC--CEI

CcaWntX2 388 -----QSTNSCLHLC--CGRGRVKYLVVEE-YDEEC-SFR-----WC--CRV

LcoWntD 342 -----DSDSDCNLC--CGGCHKQRTVTT-TQCS-C-RFF-----WC--CSV

SciWntD 360 -----GESDSCRS<sup>\*</sup>MC--CYRGYQGQTVTQK-ARCNC-RFV-----FC--CSV

ScoWntX1 351 -----SES<sup>\*</sup>DGCG<sup>\*</sup>PLC--CFRGYRAATVTQH-SPGCG-RFV-----WC--CNV

LcoWntF 406 -----DDTSPGTCKRLC--CGRGHRTVTRTIR-TSCHC-RFV-----YC--CRV

SciWntF 413 -----DFSPGSCSLC--CNRRVRTVTRVIR-QSCHC-KFV-----YC--CRV

LcoWntQ 451 -----DGS<sup>\*</sup>LDC<sup>\*</sup>DVLC--CGRGH<sup>\*</sup>TT<sup>\*</sup>VEHIT<sup>\*</sup>-TRCNC-RFI-----FC--CRV

SciWntQ 311 -----DHTPDSCDVLC--CDRGYRTVTDHTT-TSCNC-RFV-----FC--CRV

HdujWntD 298 -----ALGSDCVLC--CGRGYWRTTKSIPIRK<sup>\*</sup>ET-MED-----STTGRFEV

HdujWntE 301 -----TKPGSQQLC--CGRGQHETERVVLKQEC--KLV-----AI-RDGNV

HdujWntF 329 -----QGTGSCQLC--CSRGYTKTRETNVYVT--DFD-----TT--TFRI

HdujWntH 328 -----HGLGSCDLFC--GGRGYKRTITPTIYER--HFD-----FN--QFKI

HdujWntI 306 -----VQCRQTC--GSSQY<sup>\*</sup>ERTVIVSMPIC--FLV-----ML--GGV

HdujWntG 309 -----PSGHLLCGVLC--CGRGYQAKSQPVE--HC-RFV-----YV--SGR

OloWntII 332 -----SAPNYCPSEFC--GGYGYFSYIEKK-RSCRC-KLK-----CC--FEL

OcaWntIIa 318 -----TAENYCGSLC--CSFGNTFVERKK-KSCRC-RIEVIVG--CC--FDL

OcaWntIIb 325 -----QEGNYCGTLC--CGYGYKTYIERKK-KSCRC-QIKVVEH--CC--FKL

OcaWntIIc

OcaWnt5bX 345 -----DLAEDSCSILC--CGRGYKTMTRQEV-YPCNI-RLR-----RKPP--INI

OcaWnt6X 358 -----TQPDSSCRILC--CGRGYITVTKITT-ISCNP-RLR-----RKPP--IGI

LcoWntK 313 -----SDEGSCLSMC--CGGGNVVEEVEE--EVCEC-RHV-----FC--CRR

SciWntK 344 -----TEVSGSCYNLC--CGGSHAETVEE--TVDCD-QII-----YC--QYR

LcoWntU 253 -----ASHSCDVLC--CGREP<sup>\*</sup>AVKERTR-ROC--RRV-----ATIRGGKL

SciWntU 308 -----GHERECNKLC--CGREPLDRKYRRG-ROC--KWG-----ITIGSGKV

SciWntM 326 -----SDDEESSCKLC--CGRGY<sup>\*</sup>SARTYVKM-VNCHCTRRR-----FP--WPV

ScoWntX3 302 -----SIGSCARLC--C-RGHITNTHTRM-ERCEC-SAS-----YF--PRR

LcoWntH 313 -----ESCKKIC--GSTTVEKVRTG--SRCNC-KYM-----YC--CSL

SciWntH 292 -----DSCRKIC--GSEEKEEIGL--DRCNC-KFI-----FC--CEL

ScoWntX4 310 -----ESCRKVC--GSKVEVQMGs--NMCNC-KFH-----FC--CRL

LcoWntB 293 GP--SASKDLPICKDL<sup>\*</sup>C--CGAGVRSKRTPV--YKEMC-RFI-----WC--CVK

SciWntB 301 NPVAF<sup>\*</sup>TLLPKPGACSALC--CGRN<sup>\*</sup>ILSKDVSVV-YKSV<sup>\*</sup>C--DFK-----WD--TGR

SciWntO 227 NE--T-GPHQDGACQYLC--CGRGQRFETFRSP-YKCLC-SWSI-----AGF

HdujWntK 328 ---QLYHHHRKIGIC<sup>\*</sup>DL<sup>\*</sup>C--CN-GHRVVTEEE-YICRC-VMN-----

HdujWntJ 330 ---QSYVQNR<sup>\*</sup>LGT<sup>\*</sup>CGKIC--CNGYV<sup>\*</sup>NK<sup>\*</sup>PKV<sup>\*</sup>RTQ<sup>\*</sup>-HRCIA-QTKQ-----

LcoWntP 360 ---VSVNFQCTPACDDVC--CGTFETRNTS---VPCDC-KYS-----WKF--NKI

SciWntP 332 E--NVEYFTCTSPACNEIC--CGRLH<sup>\*</sup>THVTE---YQDCD-KLED-----WDL-----

ScoWntX2 334 RP-NGE<sup>\*</sup>HFGDTSHCQDLC--CGRSGSQVTE---YACNC-RMQKDA-----WVL-----

LcoWntL 412 -----QGTVIGSCKYLC--CGYKPKRVVTQVK-KPCNF-VLQKVAG-GGARYTY-----

SciWntL 322 -----PGIVPGSCEYLC--CGGQTEKEIEKVP-YTCNA-RLRRMPNAEGYRWIF-----

ScoWntX5 385 -----EDG<sup>\*</sup>IGSCHYLC--CGGPVETVTEVTE-RRCNA-TLVK-----DGTRYSY-----

LcoWntS 313 -----NPDGITCAGLC--CGGVVRRRRNMNV-VKSO<sup>\*</sup>C-VFV-----FC--CRI

SciWntS 381 -----DDGLTCDILC--CGRGYL<sup>\*</sup>TRVVEYHFPQCKPEQQL-----PC--CYT

```

AquWntC      338  ----QC-NDC----KRTL-TFYACR-----
PfiWntC
HdujWntC    325  ----KC-DEC----QSTV-TLSVCR-----
AquWntB     357  ----SC-EEC----EKTL-TRYKCTG-----
PfiWntB     302  ----IC-DDC----AVTV-DTYKCTS-----
EmuWntB     339  ----VC-STC----TETM-VQYKCTS-----
SlaWntB     336  ----VC-STC----TETV-VQYMCTG-----
EfrWntB     336  ----VC-NTC----TETV-TQYKCTS-----
AquWntA     328  ----EC-QDC----GEETF-TEYFCR-----
EmuWntA     203  ----EC-TVC---RNNTV-TDYFCN-----
SlaWntA     341  ----EC-TNC---KNVTM-TDYFCN-----
EfrWntA     344  ----EC-TYC---KNVTM-TDYFCN-----
CreWntA     341  -----X-----
PsuWntA     340  ----DC-AVT---GSKTI-VERRCNP-----
CcaWntX1    349  ----RC-TTC---RRQR-EAAICD-----
HdujWntL    358  ----RC-DTC---NKLE-PHFECN-----
OloWntI     322  ----EC-EKC---YRKV-KRSYCKE-----
OcaWntI     331  ----KC-DKC---EKRV-KRSYCKE-----
CcaWntI     265  ----KC-ETC---KERV-IKHFEN-----
LcoWntA     339  ----RC-QTC---KGVK-RWYTCR-----
SciWntA     337  ----VC-SRC---LTVN-KHYTCR-----
ScoWnt-i    344  ----EC-ERC---RTVS-KRYTCV-----
SciWntN     353  ----EC-DWC---RVVS-KKYTCW-----
ScoWnt-ii   354  ----HC-KQC---RTVT-KKYTCL-----
SciWntT     374  ----KC-KRC---RVAK-QSETCM-----
LcoWntE     360  ----QC-KTC---TVHK-ERHTCN-----
SciWntE     382  ----RC-RTC---LENK-ERHTCN-----
ScoWnt-iii  351  ----RC-KTC---TVNK-ERHSCN-----
LcoWntR     379  ----KC-DTC---ERAG-EIYWCE-----
SciWntR     386  ----RC-DTC---E EVE-ETKCKR-----
LcoWntC     376  ----KC-DWC---EPVY-QQFYCKTPKRTSA-----
SciWntC     362  ----KC-QWC---HKVY-RYFHCKMPRPQVA-----
ScoWnt-v    360  ----KC-QWC---HRVY-QNHCKQPRLQVT-----
LcoWntI     368  ----VC-DSC---IVAW-ETHHCNGPRAIE-----
SciWntI     363  ----VC-DYC---LVAW-ETHHCNDPLQLTARK-----
ScoWnt-iv   358  ----VC-DSC---LVAW-ETHHCNGPLLSAK-----
LcoWntJ     371  ----VC-DEC---ITAT-ETHECN-----
SciWntJ     384  ----VC-DQC---ISAE-ETHECN-----
LcoWntG     406  ----TC-DRC---VSRK-KIHVCN-----
SciWntG     405  ----TC-DRC---VSVQ-EIHTCN-----
ScoWnt-vi   403  ----TC-DRC---VSTQ-EIHTCN-----
OcaWnt2X    398  ----KC-ETC---TSTK-EKYICK-----
EmuWntC     334  ----QC-SKC---HTVT-TTYVCL-----
SlaWntC     229  ----QC-SKC---HTVT-TAYVCL-----
EfrWntC     383  ----QC-LKC---HTVK-TTYVCL-----
CreWntC     382  ----KC-ETC---TERR-TYFSCS-----
CcaWntX2    424  ----EC-KTC---RRKT-PYHVCR-----
LcoWntD     378  ----KC-STC---TKVH-EETTCAPE-----
SciWntD     396  ----KC-EEC---TTEF-ERNTCN-----
ScoWntX1    387  ----KC-DTC---TNSY-KRNTCS-----
LcoWntF     444  ----EC-QTC---EHTI-TEHFEN-----
SciWntF     450  ----EC-QTC---TRQI-TEHFCAADV-----
LcoWntQ     488  ----WC-STC---ESVR-RRHFEN-----
SciWntQ     348  ----RC-DQC---ETVR-RRHFEN-----
HdujWntD    338  ----LC-SVT---GNDIE-NRYFCN-----
HdujWntE    338  IKGFSPKC-TDV---PRRI-REYVCN-----
HdujWntF    365  VQ-----KLL---RTDTV-REHFEN-----
HdujWntH    364  VN-----RIV---RYETN-TKHFCN-----
HdujWntI    338  FR-----NTCVVTGTRMA-TQYTCQ-----
HdujWntG    344  FQ-----HIC---GRKMM-EKYCR-----
OloWntII    368  ----IC-DVC---IVER-TKYRCK-----
OcaWntIIa   358  ----RC-DTC---YDDV-EKYRCK-----
OcaWntIIb   365  ----VC-DTC---FDEI-ERYRCK-----
OcaWntIIc
OcaWnt5bX   384  ----VW-DDC---IRTA-TEYFCL-----
OcaWnt6X    397  ----EW-GTC---YKLI-TEHFEN---CHST-----
LcoWntK     348  ----VC-ENC---RTEIKTVHRCN-----GL
SciWntK     381  ----VCTKNC---RTVRRTIRKCN-----QF
LcoWntU     290  GW---KCVKPC---VSVV-RHYSCR-----
SciWntU     345  GS---RCRRYC---IYVY-KSYFCG-----
SciWntM     364  ----RC-QSC---REEE-LRYFCR-----
ScoWntX3    337  ----VCKKVC---QVQV-HEHFCK-----
LcoWntH     344  ----RC-ELCQE---KVRCKRPTQCGDSTPSIAPG-RRDE-----
SciWntH     322  ----KC-EKCLR---RQYRCKKST-CSSSTSSRS---RDEL-----
ScoWntX4    340  ----QC-EECRV---RMYRCMAPT-C---ETNSRS---RDD-----
LcoWntB     333  ----ECVNEP---TGYQTTHCR-----
SciWntB     345  ----KC-VKS---RMTS-AFYVCV-----
SciWntO     267  ----KC-QTC---HATR-RLYFCV-----
HdujWntK    363  ----DCQTC---TRKV-VRNFQV-----
HdujWntJ    367  ----DFCQHSYTRLM-DSYFCR-----
LcoWntP     399  ----LCKTTCHR---QDTVCS-----GE
SciWntP     370  ----RC-KIC---SRAV---TVCA-----
ScoWntX2    376  ----VC-QSC---SREV---TACLPPE-----
LcoWntL     456  ----DMC---NVST-VHYKCPSSNGLSRTRKRG---R-----
SciWntL     367  ----DTC---YKEV-HKCKSERKERQRASPSSIA-----
ScoWntX5    426  ----QF-QVC---RDEH-LRTCKSRRPSNRRSSGVTTLR-----
LcoWntS     350  ----PC-AMT---TKVFTQTYCR-----
SciWntS     420  ----SC-VQS---SNRR-VMTFCR-----

```
