# Supplementary material for: Wnt signaling and polarity in freshwater sponges
Source: PubMed Central journal article supplement (PMC5797367; doi:10.1186/s12862-018-1118-0), 2018-02-02
Supplement: 12862_2018_1118_MOESM3_ESM.pdf [file 12862_2018_1118_MOESM3_ESM.pdf]

A

# PhyML raw tree

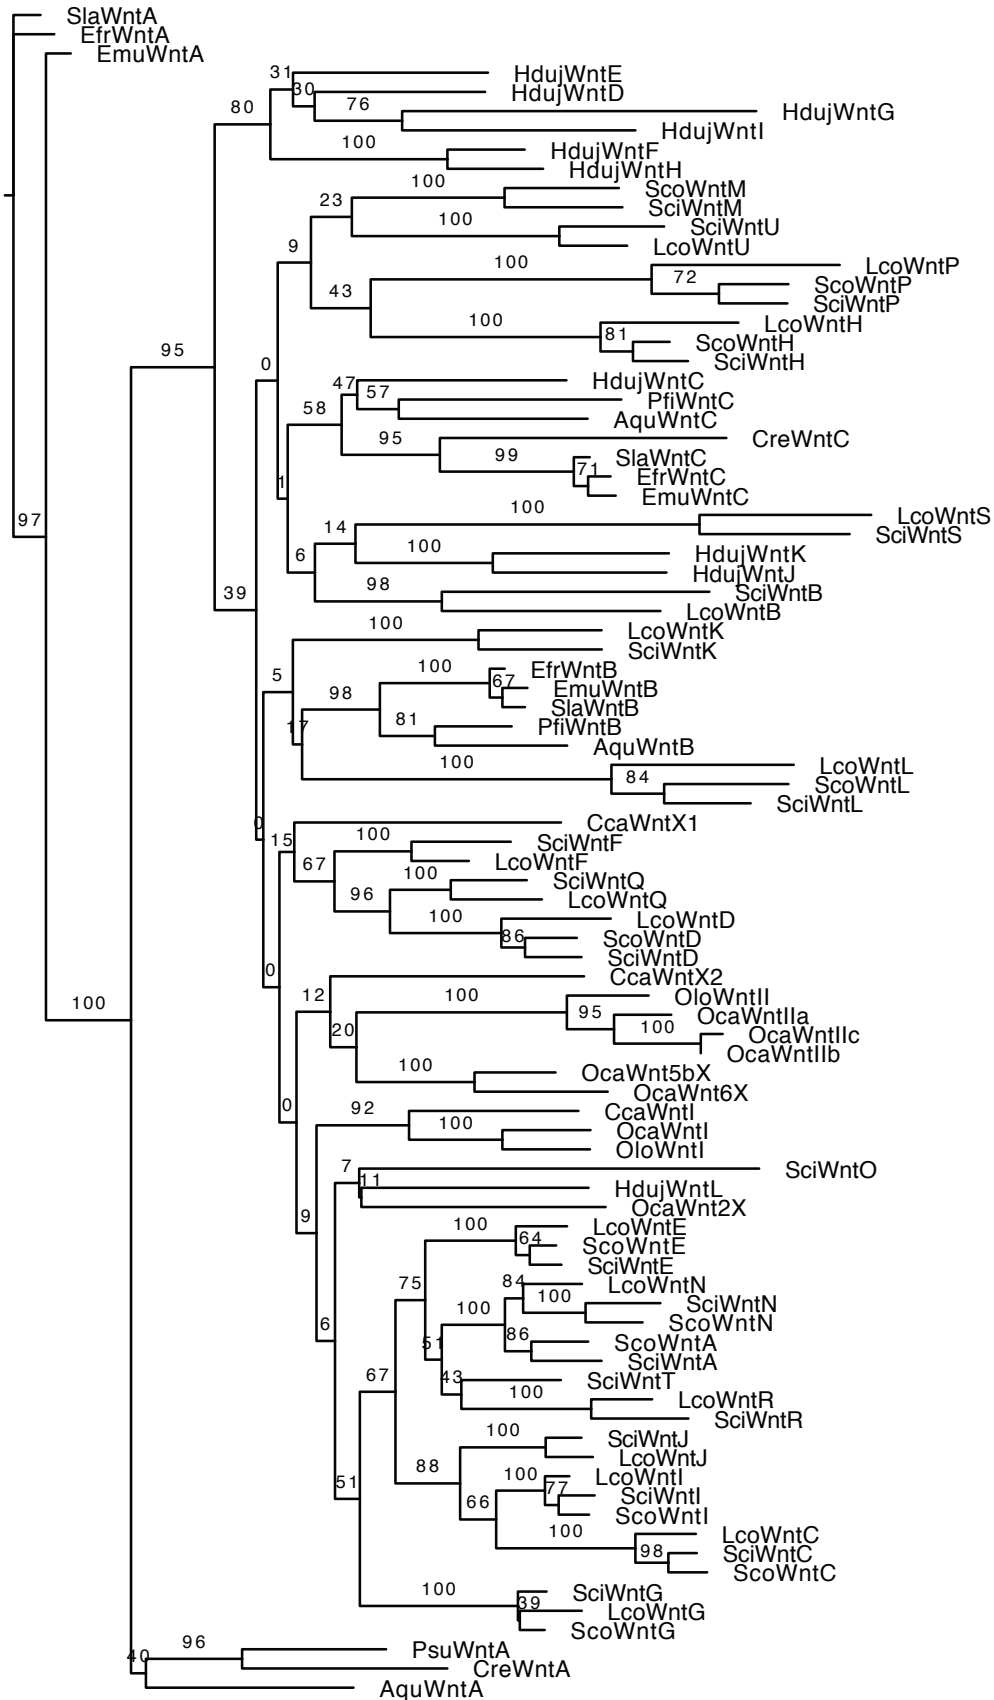

0.3



C

# IQ-TREE raw tree

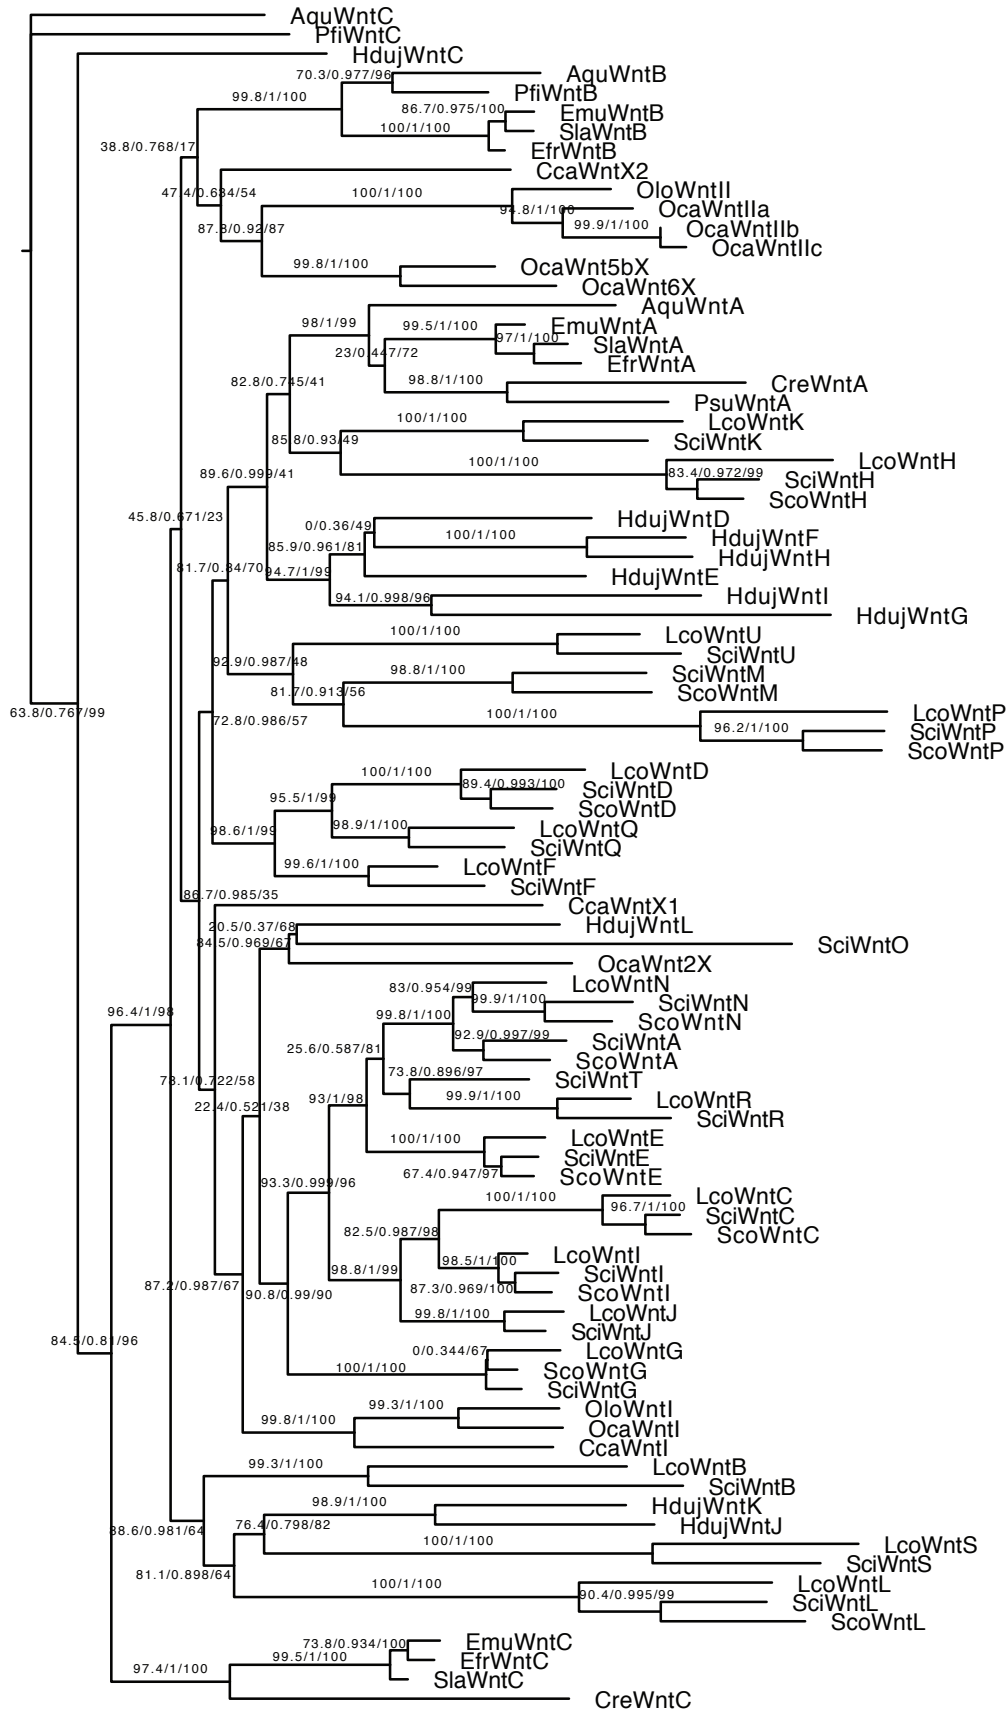

0.3
