# Supplementary material for: Wnt signaling and polarity in freshwater sponges
Source: PubMed Central journal article supplement (PMC5797367; doi:10.1186/s12862-018-1118-0), 2018-02-02
Supplement: 12862_2018_1118_MOESM4_ESM.pdf [file 12862_2018_1118_MOESM4_ESM.pdf]

**Additional File 4**

| <b>Wnt Subfamily</b> | <b>Sequence Name</b> | <b>Accession/Contig Number</b> |
|----------------------|----------------------|--------------------------------|
| <b>PorWntA</b>       | AquWntA              | ABX90060                       |
|                      | CreWntA              | Contig66998                    |
|                      | PsuWntA              | Contig252                      |
|                      | EmuWntA              | Contig16045*                   |
|                      | SlaWntA              | Contig4731                     |
|                      | EfrWntA              | Contig21562                    |
| <b>PorWntB</b>       | AquWntB              | ADO16564                       |
|                      | PfiWntB              | Contig51648                    |
|                      | EmuWntB              | ADM13617                       |
|                      | SlaWntB              | Contig12305*                   |
|                      | EfrWntB              | Contig28264                    |
| <b>PorWntC</b>       | AquWntC              | ADO16565                       |
|                      | PfiWntC              | Contig10714                    |
|                      | CreWntC              | Contig73781                    |
|                      | HdujWntC             | HADA01000006                   |
|                      | EmuWntC              | Contig23736*                   |
|                      | SlaWntC              | Contig31918                    |
|                      | EfrWntC              | Contig14524                    |
| <b>PorWntI</b>       | OcaWntI              | m.2356                         |
|                      | OloWntI              | ACS36174                       |
|                      | CcaWntI              | Contig 9259                    |
| <b>PorWntII</b>      | OcaWntIIa            | m.10180                        |
|                      | OcaWntIIb            | m.18610                        |
|                      | OcaWntIIc            | m.18615                        |
|                      | OloWntII             | ACS36175                       |
| <b>CWntA/N</b>       | SciWntA              | CDO67888                       |
|                      | ScoWntA              | Contig22889*                   |
|                      | SciWntN              | CDO67901                       |
|                      | ScoWntN              | Contig17541                    |
|                      | LcoWntN              | lcpid60387 lcgid45017          |
| <b>CWntB</b>         | SciWntB              | CDO67889                       |
|                      | LcoWntB              | lcpid67615 lcgid28365          |
| <b>CWntC</b>         | SciWntC              | CDO67890                       |
|                      | ScoWntC              | Contig16518                    |
|                      | LcoWntC              | lcpid75928 lcgid35509          |
| <b>CWntD</b>         | SciWntD              | CDO67891                       |
|                      | ScoWntD              | Contig5782                     |
|                      | LcoWntD              | lcpid87580 lcgid0311           |
| <b>CWntE</b>         | SciWntE              | CDO67892                       |
|                      | ScoWntE              | Contig14145                    |
|                      | LcoWntE              | lcpid93240 lcgid0654           |
| <b>CWntF</b>         | SciWntF              | CDO67893                       |
|                      | LcoWntF              | lcpid61054 lcgid2141           |

|                   |           |                        |
|-------------------|-----------|------------------------|
| <b>CWntG</b>      | SciWntG   | CDO67894               |
|                   | ScoWntG   | Contig38625            |
|                   | LcoWntG   | lcpid12644 lcgid42850  |
| <b>CWntH</b>      | SciWntH   | CDO67895               |
|                   | ScoWntH   | Contig29445            |
|                   | LcoWntH   | lcpid72229 lcgid34130  |
| <b>CWntI</b>      | SciWntI   | CDO67896               |
|                   | ScoWntI   | Contig12941            |
|                   | LcoWntI   | lcpid41001 lcgid58842  |
| <b>CWntJ</b>      | SciWntJ   | CDO67897               |
|                   | LcoWntJ   | lcpid19806 lcgid65167  |
| <b>CWntK</b>      | SciWntK   | CDO67898               |
|                   | LcoWntK   | lcpid80837 lcgid23822  |
| <b>CWntL</b>      | SciWntL   | CDO67899               |
|                   | ScoWntL   | Contig18533            |
|                   | LcoWntL   | lcpid58524 lcgid12336  |
| <b>CWntM</b>      | SciWntM   | CDO67900               |
|                   | ScoWntM   | Contig57224            |
| <b>CWntO</b>      | SciWntO   | CDO67902               |
| <b>CWntP</b>      | SciWntP   | CDO67903               |
|                   | ScoWntP   | Contig26375            |
|                   | LcoWntP   | lcpid80785 lcgid6025   |
| <b>CWntQ</b>      | SciWntQ   | CDO67904               |
|                   | LcoWntQ   | lcpid74153 lcgid17617  |
| <b>CWntR</b>      | SciWntR   | CDO67905               |
|                   | LcoWntR   | lcpid66521 lcgid3137   |
| <b>CWntS</b>      | SciWntS   | CDO67906               |
|                   | LcoWntS   | lcpid43958 lcgid43546  |
| <b>CWntT</b>      | SciWntT   | CDO67907               |
| <b>CWntU</b>      | SciWntU   | CDO67908               |
|                   | LcoWntU   | lcpid104953 lcgid65306 |
| <b>Unassigned</b> | HdujWntD  | HADA01000005           |
|                   | HdujWntE  | HADA01000010           |
|                   | HdujWntF  | HADA01000003           |
|                   | HdujWntG  | HADA01000002           |
|                   | HdujWntH  | HADA01000004           |
|                   | HdujWntI  | HADA01000001           |
|                   | HdujWntJ  | HADA01000009           |
|                   | HdujWntK  | HADA01000007           |
|                   | HdujWntL  | HADA01000008           |
|                   | OcaWnt2X  | m.82490                |
|                   | OcaWnt5bX | m.13224                |
|                   | OcaWnt6X  | m.25362                |
|                   | CcaWntX1  | Contig 400             |
|                   | CcaWntX2  | Contig 9097            |
