# Supplementary material for: Wnt signaling and polarity in freshwater sponges
Source: PubMed Central journal article supplement (PMC5797367; doi:10.1186/s12862-018-1118-0), 2018-02-02

Additional File 5

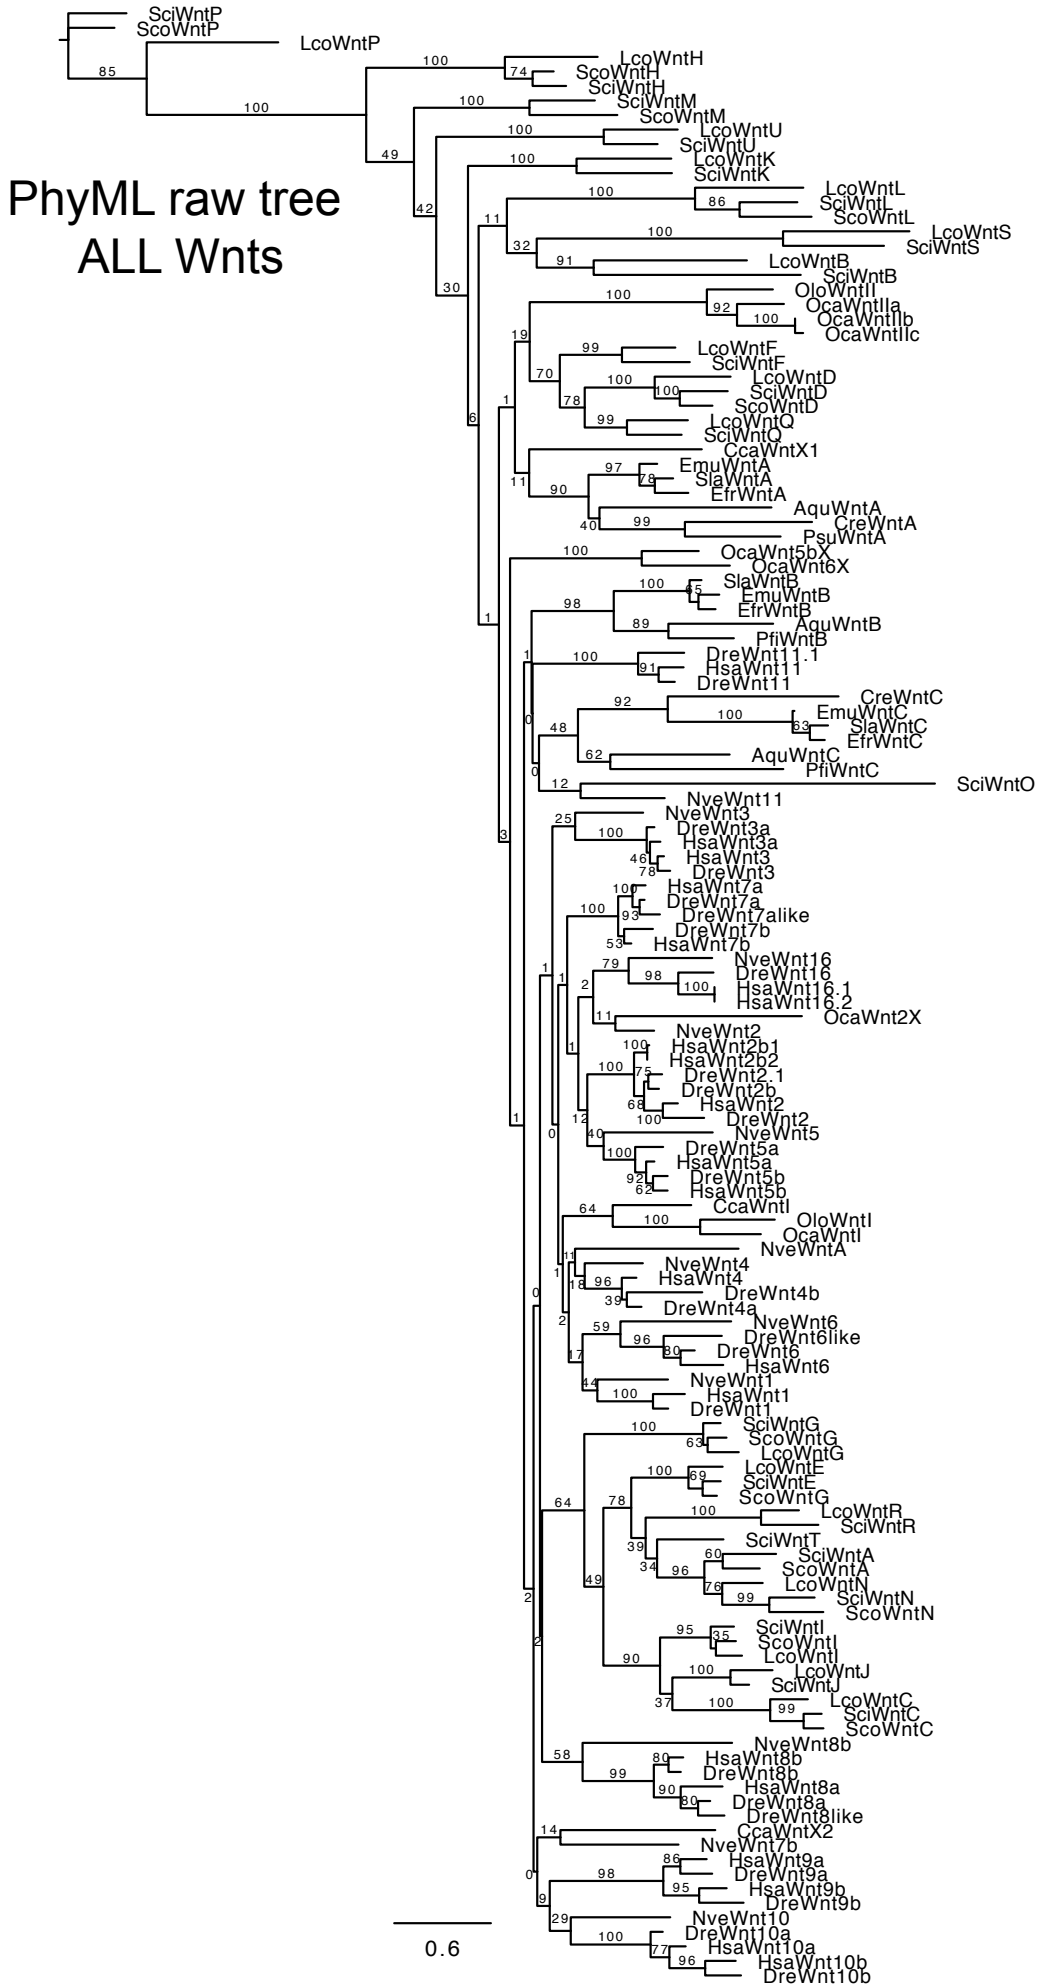

Supplement: 12862_2018_1118_MOESM5_ESM.pdf [file 12862_2018_1118_MOESM5_ESM.pdf]
