# Supplementary material for: Wnt signaling and polarity in freshwater sponges
Source: PubMed Central journal article supplement (PMC5797367; doi:10.1186/s12862-018-1118-0), 2018-02-02
Supplement: 12862_2018_1118_MOESM11_ESM.pdf [file 12862_2018_1118_MOESM11_ESM.pdf]

**Additional File 11**

| <b>Species</b>                  | <b>Sequence Name</b> | <b>NCBI Accession</b> |
|---------------------------------|----------------------|-----------------------|
| <i>Amphimedon queenslandica</i> | AquWntA              | ABX90060              |
|                                 | AquWntB              | ADO16064              |
|                                 | AquWntC              | ADO16565              |
| <i>Ephydatia muelleri</i>       | EmuWntB              | ADM13617              |
| <i>Oscarella lobularis</i>      | OloWntI              | ACS36174              |
|                                 | OloWntII             | ACS36175              |
| <i>Nematostella vectensis</i>   | NveWntA              | AAT02182              |
|                                 | NveWnt1              | AAT00640              |
|                                 | NveWnt2              | AAW28132              |
|                                 | NveWnt3              | ABF48092              |
|                                 | NveWnt4              | AAV87174              |
|                                 | NveWnt5              | AAW28133              |
|                                 | NveWnt6              | AAW28134              |
|                                 | NveWnt7b             | AAW28135              |
|                                 | NveWnt8b             | AAW28136              |
|                                 | NveWnt10             | AAT00641              |
|                                 | NveWnt11             | AAV87175              |
|                                 | NveWnt16             | ABF48091              |
|                                 | <i>Danio rerio</i>   | DreWnt1               |
| DreWnt2                         |                      | NP_571025             |
| DreWnt2b                        |                      | NP_001037809          |
| DreWnt2.1                       |                      | NP_878296             |
| DreWnt3                         |                      | NP_001108024          |
| DreWnt3a                        |                      | NP_001007186          |
| DreWnt4a                        |                      | NP_001035477          |
| DreWnt4b                        |                      | NP_571575             |
| DreWnt5a                        |                      | NP_001073303          |
| DreWnt5b                        |                      | NP_571012             |
| DreWnt6                         |                      | XP_003199237          |
| DreWnt6like                     |                      | XP_002662357          |
| DreWnt7a                        |                      | NP_001020711          |
| DreWnt7alike                    |                      | XP_696514             |
| DreWnt7b                        |                      | XP_691878             |
| DreWnt8a                        |                      | NP_571021             |
| DreWnt8b                        |                      | NP_571034             |
| DreWnt8like                     |                      | NP_00108637           |
| DreWnt9a                        |                      | NP_001038828          |
| DreWnt9b                        |                      | NP_001131132          |
| DreWnt10a                       |                      | NP_571055             |
| DreWnt10b                       |                      | NP_835737             |
| DreWnt11                        |                      | NP_571151             |
| DreWnt11.1                      | NP_001138276         |                       |
| DreWnt16                        | NP_001093516         |                       |
| <i>Homo sapiens</i>             | HsaWnt1              | NP_005421             |
|                                 | HsaWnt2              | NP_003382             |
|                                 | HsaWnt2b1            | NP_004176             |
|                                 | HsaWnt2b2            | NP_078613             |

---

|            |           |
|------------|-----------|
| HsaWnt3    | NP_110380 |
| HsaWnt3a   | NP_149122 |
| HsaWnt4    | NP_110388 |
| HsaWnt5a   | NP_003383 |
| HsaWnt5b   | NP_110402 |
| HsaWnt6    | NP_006513 |
| HsaWnt7a   | NP_004616 |
| HsaWnt7b   | NP_478679 |
| HsaWnt8a   | NP_490645 |
| HsaWnt8b   | NP_003384 |
| HsaWnt9a   | NP_003386 |
| HsaWnt9b   | NP_003387 |
| HsaWnt10a  | NP_079492 |
| HsaWnt10b  | NP_003385 |
| HsaWnt11   | NP_004617 |
| HsaWnt16.1 | NP_476509 |
| HsaWnt16.2 | NP_057171 |

---
