# Supplementary material for: Wnt signaling and polarity in freshwater sponges
Source: PubMed Central journal article supplement (PMC5797367; doi:10.1186/s12862-018-1118-0), 2018-02-02
Supplement: 12862_2018_1118_MOESM12_ESM.pdf [file 12862_2018_1118_MOESM12_ESM.pdf]

## Additional File 12

| <b>Purpose</b>             | <b>Primer Name</b> | <b>Sequence (5' to 3')</b>                                 |
|----------------------------|--------------------|------------------------------------------------------------|
| <b>Riboprobe Synthesis</b> | pEmuSilcM2 F       | TGG CAA GTT TAG CAA TGG CTG TCC                            |
|                            | pEmuSilcM2 R       | CAC CAG CAT GGC ATG ATT GAG CTT                            |
|                            | pEmuWntA F         | GGT AAG AAA CTC AGG ATG CC                                 |
|                            | pEmuWntA R         | CCC AAA GTA AAC GTA GCG TC                                 |
|                            | pEmuWntB F         | GTG CAT CTG GGT ATT TCA CG                                 |
|                            | pEmuWntB R         | CCG ACA TAG CTA GTC ATG TTG GAG                            |
|                            | pEmuWntC F         | GAT CAA TAT GCT GGA GTG CC                                 |
|                            | pEmuWntC R         | CCG TAG ATC AGA GTT CTA TCG GTG                            |
|                            | pEmuBcat F         | GAG TCA AGA CGA GAT AGT GGA G                              |
|                            | pEmuBcat R         | GAT AGG ATG GAG TAT GGG ACT G                              |
|                            | pEmuDsh F          | CAA CAG ACC TAG ATG CTA CC                                 |
|                            | pEmuDsh R          | GGA AGA GGT CCA AGT GTA TC                                 |
|                            | pEmuGSK3 F         | GTA CAG AGT GAT ACG ACA CC                                 |
|                            | pEmuGSK3 R         | CCG CCT AAA CTC AAC AGA AG                                 |
|                            | pEmuFz1 F          | GTC TCC TCT TCA CCT TCT TCA C                              |
|                            | pEmuFz1 R          | GAG TAG AGA AAC TAG ACT GCC G                              |
|                            | pEmuFz2/4 F        | CGA CTA ACT CTA CAT GTG TCG G                              |
|                            | pEmuFz2/4 R        | GAA CTG TCA TGA CCA GAG GTA G                              |
|                            | pEmuFz3 F          | GCT AGA GGG CTA TTC TAC CTT TCC                            |
|                            | pEmuFz3 R          | CTT AAG TCT GAG GAG GAG GAT G                              |
|                            | pEmuTCF F          | GAC GAG TAA TGT CAG CAC AG                                 |
|                            | pEmuTCF R          | CTT CTT CTT ACG CCT ACA CG                                 |
|                            | <b>RNAi</b>        | RNAi-EmuGSK3 F                                             |
| RNAi-EmuGSK3 R             |                    | <i>CGA CTC ACT ATA GGG</i> AGA CAA CCC CAA ATG ATC CA      |
| RNAi-SilcM2 F              |                    | <i>CGA CTC ACT ATA GGG</i> GGA GAG ACA TGC CAT TTG GT      |
| RNAi-SilcM2 R              |                    | <i>CGA CTC ACT ATA GGG</i> CTG GAC ACC TTT CGG AGC TA      |
| Full T7 F-R                |                    | <i>ATA GAA TTC TCT AGA AGC TTA ATA CGA CTC ACT ATA GGG</i> |

\* Text in italics indicates a T7 universal sequence, regular text is sequence-specific.
